# Supplementary material for: Danon Disease-Associated LAMP-2 Deficiency Drives Metabolic Signature Indicative of Mitochondrial Aging and Fibrosis in Cardiac Tissue and hiPSC-Derived Cardiomyocytes
Source: MDPI journal article supplement (doi:10.3390/jcm9082457), 2020-07-31
Supplement: s1 [file s1]

## hiPS-CM Transcriptome analysis FDR <0.01

|          |      |     |     |          |     |      |     |
|----------|------|-----|-----|----------|-----|------|-----|
| >10      | 10-3 | 3-2 | 2-1 | 1-2      | 2-3 | 3-10 | >10 |
| DECREASE |      |     |     | INCREASE |     |      |     |

| Common_name    | Control_mean   | Danon_mean    | Fold_change | Pvalue     |
|----------------|----------------|---------------|-------------|------------|
| RP11-11N5.3    | 6,79           | 0,08          | -84,88      | 1,09E-05   |
| RPS4XP22       | 81,67          | 1,14          | -71,64      | 1,20E-06   |
| RP11-11N5.1    | 8,02           | 0,15          | -53,47      | 0,00014414 |
| FAR2P1         | 15,73          | 0,71          | -22,15      | 0,0003632  |
| PRG4           | 103,77         | 4,69          | -22,13      | 0,00013289 |
| LAMP2          | 138,15         | 7,44          | -18,57      | 3,24E-09   |
| LRFN5          | 10,31          | 0,57          | -18,09      | 0,00030552 |
| JPH4           | 22,08          | 1,5           | -14,72      | 0,00036037 |
| RARRES2        | 231,23         | 16,34         | -14,15      | 0,00030567 |
| <b>COL1A2</b>  | <b>4622,43</b> | <b>361,46</b> | -12,79      | 0,00035762 |
| SMOC2          | 94,93          | 7,58          | -12,52      | 0,00031974 |
| INHBE          | 6,39           | 0,57          | -11,21      | 4,53E-06   |
| ALDH1L2        | 21,67          | 2,14          | -10,13      | 5,05E-05   |
| NTNG1          | 12,94          | 1,28          | -10,11      | 0,00023748 |
| KCNE4          | 14,85          | 1,52          | -9,77       | 1,78E-05   |
| PIEZO2         | 68,93          | 7,21          | -9,56       | 0,00037826 |
| RP5-855D21.1   | 9,19           | 0,97          | -9,47       | 1,15E-05   |
| BRINP2         | 8,16           | 0,87          | -9,38       | 1,55E-05   |
| CD248          | 63,05          | 7,1           | -8,88       | 0,00040496 |
| <b>COL11A1</b> | <b>168,43</b>  | <b>20,83</b>  | -8,09       | 6,98E-05   |
| PLAC9          | 74,8           | 9,28          | -8,06       | 0,00027539 |
| TMEM200A       | 14,69          | 1,86          | -7,9        | 2,97E-05   |
| NPR1           | 23,41          | 3,16          | -7,41       | 0,00014172 |
| ADAMTS5        | 9,2            | 1,25          | -7,36       | 0,00042573 |
| NRK            | 8,4            | 1,17          | -7,18       | 0,00012321 |
| GRIK2          | 8,53           | 1,19          | -7,17       | 0,00027427 |
| HPCAL4         | 7,08           | 0,99          | -7,15       | 0,00018715 |
| RP11-87H9.2    | 7,45           | 1,07          | -6,96       | 8,44E-07   |
| AC073610.5     | 34,49          | 5,06          | -6,82       | 0,00042922 |
| FAP            | 111,54         | 16,55         | -6,74       | 0,00028863 |
| HAS1           | 8,08           | 1,24          | -6,52       | 0,00014815 |
| HS6ST2         | 8,31           | 1,31          | -6,34       | 1,04E-05   |
| CLDN15         | 34,56          | 5,58          | -6,19       | 1,76E-05   |
| LINC01133      | 35,25          | 5,79          | -6,09       | 0,00022259 |
| ZNF248         | 14,75          | 2,43          | -6,07       | 1,28E-05   |
| CDON           | 117,9          | 19,45         | -6,06       | 0,00030544 |
| RNU1-122P      | 5,78           | 0             | -6          | 5,59E-08   |
| LPAR1          | 36,95          | 6,21          | -5,95       | 9,30E-05   |

|               |          |         |       |            |
|---------------|----------|---------|-------|------------|
| CBLN3         | 7,44     | 1,28    | -5,81 | 4,50E-05   |
| EPHB6         | 50,42    | 8,69    | -5,8  | 0,00042459 |
| SPON2         | 32,08    | 5,56    | -5,77 | 0,00041355 |
| ADGRA2        | 80,84    | 14,04   | -5,76 | 0,0003192  |
| DDR2          | 43,78    | 7,67    | -5,71 | 0,00026401 |
| GABRA2        | 8,78     | 1,59    | -5,52 | 0,0001664  |
| IQCA1         | 10,38    | 1,91    | -5,43 | 0,00040822 |
| MESTP3        | 33,56    | 6,19    | -5,42 | 0,00013279 |
| MESTP2        | 6,68     | 1,25    | -5,34 | 5,75E-05   |
| ADM2          | 10,61    | 2,04    | -5,2  | 5,05E-07   |
| TNXB          | 17,91    | 3,5     | -5,12 | 0,0002142  |
| C10orf107     | 9,46     | 1,9     | -4,98 | 0,00028617 |
| FKBP7         | 83,85    | 17,1    | -4,9  | 0,00020777 |
| MEST          | 542,06   | 110,81  | -4,89 | 2,91E-05   |
| RP11-736K20.5 | 17,98    | 3,7     | -4,86 | 7,73E-05   |
| LXN           | 159,37   | 33,67   | -4,73 | 0,00025446 |
| MGP           | 2139,43  | 459,89  | -4,65 | 5,41E-06   |
| DPP10         | 7,89     | 1,73    | -4,56 | 0,00016096 |
| SPARC         | 15044,33 | 3371,07 | -4,46 | 0,00025986 |
| MESTP1        | 25,19    | 5,67    | -4,44 | 0,00018383 |
| CPZ           | 55,87    | 12,86   | -4,34 | 0,00018329 |
| C2            | 10,56    | 2,46    | -4,29 | 0,00035194 |
| ASPN          | 31,55    | 7,73    | -4,08 | 0,00040288 |
| PSAT1         | 153,47   | 37,96   | -4,04 | 0,00013694 |
| SLC7A4        | 11,92    | 3,01    | -3,96 | 0,00029075 |
| MTND4P24      | 104,43   | 26,71   | -3,91 | 1,01E-05   |
| SNCAIP        | 53       | 13,6    | -3,9  | 2,38E-05   |
| TRAF5         | 36,6     | 9,41    | -3,89 | 0,00030853 |
| SERPING1      | 535,07   | 138,67  | -3,86 | 0,00028898 |
| LTBP2         | 89,46    | 23,3    | -3,84 | 5,02E-05   |
| BTBD19        | 20,64    | 5,37    | -3,84 | 0,00015109 |
| SULF2         | 282,73   | 74,62   | -3,79 | 0,00010153 |
| CLEC2D        | 13,74    | 3,66    | -3,75 | 4,79E-05   |
| GXYLT2        | 33,95    | 9,12    | -3,72 | 1,12E-05   |
| FKBP11        | 99,38    | 26,82   | -3,71 | 0,00011418 |
| LRP1          | 264,21   | 75,35   | -3,51 | 7,79E-05   |
| PKNOX2        | 11,25    | 3,27    | -3,44 | 0,0001208  |
| HNMT          | 27,98    | 8,13    | -3,44 | 0,0002987  |
| IL18R1        | 9,46     | 2,76    | -3,43 | 0,00041644 |
| FBXO4         | 9,67     | 2,97    | -3,26 | 3,13E-05   |
| PTK7          | 367,06   | 114,16  | -3,22 | 0,00015795 |
| IL11          | 7,83     | 2,47    | -3,17 | 0,00011788 |
| WISP1         | 12,01    | 3,84    | -3,13 | 0,00020543 |
| MAF           | 39,44    | 12,66   | -3,12 | 0,0003673  |

|           |         |         |       |            |
|-----------|---------|---------|-------|------------|
| PHGDH     | 299,02  | 96,37   | -3,1  | 7,06E-06   |
| TBC1D8B   | 8,58    | 2,77    | -3,1  | 0,00034464 |
| CCDC122   | 16,68   | 5,41    | -3,08 | 0,00027549 |
| PTPRG     | 19,18   | 6,27    | -3,06 | 0,00025511 |
| LY6E      | 331,69  | 108,96  | -3,04 | 0,00034328 |
| APBB2     | 52,08   | 17,81   | -2,92 | 0,00012544 |
| PCK2      | 72,25   | 24,87   | -2,91 | 0,00033612 |
| MARVELD1  | 131,61  | 45,31   | -2,9  | 0,0003037  |
| DNM1      | 63,74   | 22,03   | -2,89 | 0,00027622 |
| ZMYM6NB   | 41,82   | 14,57   | -2,87 | 0,00017679 |
| PXK       | 43,05   | 15,32   | -2,81 | 2,29E-05   |
| NEO1      | 159,19  | 57,19   | -2,78 | 0,00032437 |
| KIZ       | 57,38   | 20,87   | -2,75 | 0,00022039 |
| GCNT1     | 11,38   | 4,23    | -2,69 | 0,00032926 |
| KLHL29    | 10,85   | 4,07    | -2,67 | 0,00024342 |
| ENOX1     | 12,37   | 4,69    | -2,64 | 9,37E-06   |
| P4HA1     | 163,95  | 62      | -2,64 | 0,00012944 |
| DSE       | 44,94   | 17,44   | -2,58 | 0,00033504 |
| SPRY1     | 94,45   | 37,52   | -2,52 | 0,00012959 |
| GPX8      | 259,26  | 103,71  | -2,5  | 0,00011293 |
| MMP14     | 343,81  | 139,71  | -2,46 | 6,38E-05   |
| TPBG      | 31,78   | 13,1    | -2,43 | 0,00016889 |
| WARS      | 448,18  | 184,91  | -2,42 | 0,00016246 |
| RRBP1     | 174,26  | 72,42   | -2,41 | 8,66E-05   |
| ASS1      | 462,45  | 193,3   | -2,39 | 2,26E-05   |
| ARHGEF2   | 172,9   | 72,26   | -2,39 | 0,00011304 |
| SERPINH1  | 1147,28 | 484,03  | -2,37 | 0,00027749 |
| RNF24     | 25,78   | 10,97   | -2,35 | 0,00042121 |
| CEBPB     | 54,41   | 23,78   | -2,29 | 0,000319   |
| P4HA2     | 300,29  | 131,57  | -2,28 | 4,72E-06   |
| IGLV5-52  | 16,33   | 7,24    | -2,26 | 0,00010522 |
| C17orf51  | 10,34   | 4,57    | -2,26 | 0,0004095  |
| MPZL1     | 194,88  | 87,2    | -2,23 | 0,00028591 |
| MTHFD2P7  | 19,1    | 8,68    | -2,2  | 2,42E-05   |
| SLC1A5    | 223,91  | 101,77  | -2,2  | 4,27E-05   |
| PDIA5     | 61,21   | 27,81   | -2,2  | 0,00025048 |
| SNX30     | 15,1    | 6,9     | -2,19 | 0,00023031 |
| EPHB2     | 52,03   | 24,11   | -2,16 | 0,0002808  |
| C14orf132 | 10,73   | 5,06    | -2,12 | 2,21E-05   |
| SPG20     | 114,61  | 54,59   | -2,1  | 0,00035983 |
| LMF1      | 26,67   | 12,81   | -2,08 | 0,00025736 |
| IRAK4     | 11,27   | 5,6     | -2,01 | 0,00012496 |
| 15.Sep    | 3726,12 | 1850,98 | -2,01 | 0,0002318  |
| MTHFD2    | 156,2   | 79,02   | -1,98 | 2,40E-05   |

|             |         |         |       |            |
|-------------|---------|---------|-------|------------|
| ITPR1       | 23,07   | 11,64   | -1,98 | 0,00010864 |
| BX322557.10 | 14,45   | 7,31    | -1,98 | 0,0003372  |
| NUPR1       | 322,12  | 162,93  | -1,98 | 0,0003927  |
| FTLP2       | 42,98   | 22,38   | -1,92 | 0,00010986 |
| AC011737.2  | 48,72   | 25,47   | -1,91 | 0,00016377 |
| SUMF2       | 151,96  | 80,25   | -1,89 | 0,00017475 |
| IFT20       | 98,34   | 52,11   | -1,89 | 0,00040311 |
| CDR2        | 40,83   | 21,72   | -1,88 | 0,00019639 |
| CLN5        | 28,8    | 15,64   | -1,84 | 0,00023377 |
| SSR2        | 652,19  | 356,99  | -1,83 | 0,00020276 |
| GARS        | 399,12  | 220,25  | -1,81 | 9,41E-05   |
| UGDH        | 66,4    | 37,58   | -1,77 | 0,00016582 |
| IFNAR2      | 33,65   | 18,98   | -1,77 | 0,00020236 |
| CDC40       | 30,87   | 17,9    | -1,72 | 0,00011203 |
| TMBIM4      | 46,6    | 27,12   | -1,72 | 0,00035835 |
| SEC61B      | 428,77  | 252,3   | -1,7  | 0,00032599 |
| SLC48A1     | 31,25   | 18,58   | -1,68 | 0,00033094 |
| CKAP4       | 241,24  | 144,19  | -1,67 | 0,00033603 |
| POFUT1      | 64,8    | 39,14   | -1,66 | 0,0003982  |
| ZFP36L1     | 256,4   | 156,56  | -1,64 | 5,62E-05   |
| NUDT2       | 44,84   | 27,71   | -1,62 | 2,95E-06   |
| MEIS3       | 92,77   | 57,29   | -1,62 | 8,05E-05   |
| SLC35E2B    | 22,59   | 14,31   | -1,58 | 0,00034745 |
| MAP2K5      | 26,13   | 16,66   | -1,57 | 6,91E-05   |
| SEC61A1     | 436,57  | 281,97  | -1,55 | 3,64E-05   |
| PLD3        | 1299,78 | 838,34  | -1,55 | 0,00032567 |
| SLC37A3     | 96,93   | 65,69   | -1,48 | 1,66E-05   |
| PTBP1       | 386,02  | 260,38  | -1,48 | 6,91E-05   |
| HDLBP       | 1727,61 | 1168,92 | -1,48 | 9,72E-05   |
| TXNDC15     | 161,41  | 109,42  | -1,48 | 0,0001665  |
| CNN2        | 362,19  | 249,44  | -1,45 | 2,70E-05   |
| YIPF5       | 105,44  | 73,56   | -1,43 | 0,00010998 |
| MYDGF       | 177,59  | 123,87  | -1,43 | 0,00013164 |
| MAN1B1      | 100,39  | 70,31   | -1,43 | 0,00026468 |
| ARPC5       | 250,77  | 175,84  | -1,43 | 0,00032852 |
| EIF2S3      | 209,84  | 148,14  | -1,42 | 0,00015818 |
| GLG1        | 122,14  | 87,18   | -1,4  | 1,40E-05   |
| SSR4        | 524,53  | 373,97  | -1,4  | 4,34E-05   |
| FAF2        | 41,34   | 30,04   | -1,38 | 0,00014165 |
| ARCN1       | 197,4   | 144,81  | -1,36 | 0,00024514 |
| SRPRB       | 97,37   | 73,21   | -1,33 | 9,44E-05   |
| SLC39A9     | 44,03   | 33,8    | -1,3  | 0,00013247 |
| ALDH9A1     | 126,52  | 98,74   | -1,28 | 0,00034536 |
| COG1        | 41,88   | 52,44   | 1,25  | 6,41E-05   |

|               |         |         |      |            |
|---------------|---------|---------|------|------------|
| SNAP29        | 37,31   | 47,26   | 1,27 | 3,81E-05   |
| C1QBP         | 229,22  | 293,96  | 1,28 | 5,94E-05   |
| SOD1          | 286,19  | 366,83  | 1,28 | 0,00039956 |
| PITRM1        | 68,67   | 89,3    | 1,3  | 1,57E-05   |
| ACOT9         | 67,8    | 89,05   | 1,31 | 1,91E-05   |
| TSG101        | 203,15  | 267,48  | 1,32 | 6,36E-05   |
| DCTN2         | 417,02  | 548,58  | 1,32 | 0,00024836 |
| EIF2B2        | 64,42   | 86,18   | 1,34 | 0,00014177 |
| EIF2B3        | 29,42   | 39,58   | 1,35 | 0,00020304 |
| RP11-286N22.8 | 41,93   | 58,2    | 1,39 | 0,00032639 |
| AGK           | 28,71   | 40,15   | 1,4  | 1,59E-06   |
| ISCA2         | 63,97   | 89,36   | 1,4  | 1,75E-05   |
| HADHA         | 161,51  | 226,52  | 1,4  | 0,00016252 |
| MRPS25        | 71,72   | 100,34  | 1,4  | 0,00020709 |
| VMA21         | 16,62   | 23,5    | 1,41 | 0,00020945 |
| ARMCX6        | 52,54   | 74,77   | 1,42 | 5,15E-06   |
| PAF1          | 54,13   | 76,87   | 1,42 | 7,55E-05   |
| LDHB          | 1968,95 | 2802,46 | 1,42 | 0,0002082  |
| MRPL40        | 46,64   | 66,59   | 1,43 | 0,00014549 |
| MITF          | 13,6    | 19,4    | 1,43 | 0,0004074  |
| NDUFS3        | 314,45  | 454,33  | 1,44 | 0,00010392 |
| C20orf194     | 16,85   | 24,46   | 1,45 | 0,00037873 |
| NNT           | 137,78  | 202,38  | 1,47 | 0,00035042 |
| VDAC3         | 317,92  | 471,68  | 1,48 | 3,07E-05   |
| FAM127B       | 103,08  | 154,47  | 1,5  | 0,00021944 |
| COQ6          | 37,63   | 56,99   | 1,51 | 4,84E-05   |
| UBE2MP1       | 47,65   | 72,14   | 1,51 | 0,00011813 |
| NDUFAF5       | 55,64   | 83,95   | 1,51 | 0,0001269  |
| MCAT          | 19,02   | 28,78   | 1,51 | 0,00021136 |
| SAR1B         | 65,83   | 99,56   | 1,51 | 0,00031229 |
| NDUFA10       | 151,94  | 231,45  | 1,52 | 0,00013586 |
| PPP3CC        | 22,59   | 34,38   | 1,52 | 0,00024974 |
| MRPL53        | 170,68  | 260,02  | 1,52 | 0,00038856 |
| HINT2         | 63,62   | 97,24   | 1,53 | 6,81E-05   |
| COA3          | 99,1    | 151,42  | 1,53 | 0,00010808 |
| MMAB          | 63,07   | 96,2    | 1,53 | 0,00034094 |
| COA4          | 75,88   | 117,48  | 1,55 | 6,06E-06   |
| FAM63A        | 13,05   | 20,52   | 1,57 | 0,00013483 |
| ALKBH1        | 15,05   | 23,81   | 1,58 | 0,00020908 |
| AC007318.5    | 191,6   | 302,37  | 1,58 | 0,00029644 |
| ATPAF1        | 102,52  | 162,84  | 1,59 | 4,12E-06   |
| RP11-638I2.10 | 13,34   | 21,21   | 1,59 | 9,28E-05   |
| NDUFB10       | 205,39  | 326,31  | 1,59 | 0,00018275 |
| ATP5A1P3      | 33,54   | 53,35   | 1,59 | 0,0002267  |

|              |         |          |      |            |
|--------------|---------|----------|------|------------|
| UBAC1        | 59,03   | 93,94    | 1,59 | 0,00037602 |
| FH           | 117,91  | 188,59   | 1,6  | 4,90E-05   |
| ATP5A1       | 760,97  | 1216,89  | 1,6  | 0,00019817 |
| PGM1         | 86,03   | 138,3    | 1,61 | 9,94E-05   |
| ITGB1BP1     | 149,71  | 241,61   | 1,61 | 0,00010197 |
| C7orf55      | 43,69   | 70,49    | 1,61 | 0,0003568  |
| RP11-421N8.1 | 65,21   | 105,96   | 1,62 | 9,84E-05   |
| C14orf2      | 946,3   | 1530,38  | 1,62 | 0,00017341 |
| ATP5I        | 1301,23 | 2118,93  | 1,63 | 4,67E-05   |
| NDUFA3       | 416,4   | 677,34   | 1,63 | 0,00027848 |
| MTFR1L       | 131     | 216,43   | 1,65 | 3,08E-05   |
| PNPO         | 11,59   | 19,16    | 1,65 | 5,45E-05   |
| COX7A2       | 1129,68 | 1862,65  | 1,65 | 0,00011754 |
| MRPS7        | 127,95  | 211,59   | 1,65 | 0,0003323  |
| ELAC2        | 81,66   | 135,38   | 1,66 | 5,42E-05   |
| MPC2         | 131,73  | 222,69   | 1,69 | 5,81E-06   |
| ATP5F1P7     | 17,92   | 30,35    | 1,69 | 0,00019105 |
| COX5B        | 418,34  | 708,46   | 1,69 | 0,00033955 |
| SPRYD4       | 9,56    | 16,28    | 1,7  | 5,09E-05   |
| IDH3B        | 106,48  | 180,64   | 1,7  | 0,00012881 |
| MRPL2        | 93,91   | 160,04   | 1,7  | 0,00017616 |
| PPP1R12B     | 63,52   | 108,09   | 1,7  | 0,00022949 |
| MT-ND1       | 5368,64 | 9216,64  | 1,72 | 4,07E-05   |
| FNDCA        | 10,13   | 17,46    | 1,72 | 5,85E-05   |
| MXRA7        | 280,76  | 484,12   | 1,72 | 0,00018404 |
| TACO1        | 24,56   | 42,41    | 1,73 | 2,57E-05   |
| MT-CYB       | 9439,03 | 16367,02 | 1,73 | 9,86E-05   |
| SDHAP1       | 8,15    | 14,15    | 1,74 | 4,72E-05   |
| SEC61A2      | 20,82   | 36,46    | 1,75 | 0,00018614 |
| MTATP6P1     | 1240,71 | 2168,75  | 1,75 | 0,00041824 |
| PRKACA       | 152,69  | 268,55   | 1,76 | 1,13E-06   |
| RPL23AP53    | 7,58    | 13,38    | 1,77 | 5,99E-05   |
| AC007383.6   | 35,36   | 62,87    | 1,78 | 7,94E-05   |
| AS3MT        | 22,06   | 39,55    | 1,79 | 1,36E-05   |
| SPAG7        | 174,37  | 311,51   | 1,79 | 2,55E-05   |
| UQCC2        | 199,97  | 358,07   | 1,79 | 0,00020508 |
| COX10        | 12,38   | 22,18    | 1,79 | 0,0002844  |
| TMEM176B     | 218,19  | 392,02   | 1,8  | 0,00027312 |
| CADPS        | 14,14   | 25,41    | 1,8  | 0,00039337 |
| MT-CO2       | 15998,9 | 29217,03 | 1,83 | 0,00015823 |
| GRPEL1       | 55,39   | 102,48   | 1,85 | 0,00023711 |
| TMEM246      | 8,34    | 15,44    | 1,85 | 0,00039452 |
| DGKD         | 43,25   | 80,57    | 1,86 | 0,00021129 |
| GBA2         | 72,01   | 134,02   | 1,86 | 0,00031326 |

|            |        |         |      |            |
|------------|--------|---------|------|------------|
| SFXN4      | 59,96  | 113,42  | 1,89 | 0,00010535 |
| NDUFA6     | 302,34 | 572,02  | 1,89 | 0,00013241 |
| MFN2       | 118,86 | 224,27  | 1,89 | 0,00036342 |
| COQ3       | 15,09  | 28,8    | 1,91 | 0,00023299 |
| ACYP1      | 30,13  | 57,56   | 1,91 | 0,00025333 |
| PRKAG2     | 138,28 | 265,06  | 1,92 | 1,11E-05   |
| C10orf35   | 12,82  | 24,76   | 1,93 | 0,00010281 |
| NDUFA7     | 120,33 | 232,29  | 1,93 | 0,00025788 |
| ACSS2      | 119,85 | 232,49  | 1,94 | 4,46E-06   |
| UQCRFS1    | 37,96  | 73,81   | 1,94 | 7,29E-05   |
| PGP        | 14,28  | 27,85   | 1,95 | 4,00E-06   |
| ZNF622     | 44,75  | 87,26   | 1,95 | 0,00021461 |
| NEURL2     | 7,25   | 14,12   | 1,95 | 0,00023146 |
| MRPL46     | 32,04  | 62,87   | 1,96 | 6,81E-06   |
| VPS13D     | 40,87  | 80,31   | 1,97 | 0,00020438 |
| PPIF       | 87,51  | 173,56  | 1,98 | 0,00039576 |
| PGK1P2     | 11,85  | 23,5    | 1,98 | 0,00041521 |
| HDHD1      | 15,21  | 30,25   | 1,99 | 0,00012738 |
| SDHB       | 398,68 | 795,31  | 1,99 | 0,00024853 |
| TMEM116    | 13,64  | 27,52   | 2,02 | 0,00016073 |
| PRDX2      | 507    | 1030,81 | 2,03 | 0,00026883 |
| ATP5G3     | 688,31 | 1401,91 | 2,04 | 0,00025971 |
| ALDOAP1    | 21,96  | 45,42   | 2,07 | 6,85E-05   |
| DCXR       | 196,5  | 408,56  | 2,08 | 6,86E-05   |
| CS         | 116,84 | 245,74  | 2,1  | 5,40E-06   |
| NLRP2      | 34,38  | 72,06   | 2,1  | 0,00017625 |
| SLC25A11   | 102,33 | 214,68  | 2,1  | 0,00037598 |
| GPI        | 249,43 | 525,79  | 2,11 | 0,00011303 |
| CTB-52I2.4 | 12,33  | 26,08   | 2,12 | 1,95E-05   |
| C6orf136   | 51,3   | 110,23  | 2,15 | 0,0002586  |
| NUTM2A-AS1 | 5,15   | 11,21   | 2,18 | 0,00019484 |
| GATB       | 49,74  | 108,85  | 2,19 | 0,00029423 |
| CEP85      | 8,96   | 19,72   | 2,2  | 5,64E-05   |
| SRP14-AS1  | 11,16  | 24,83   | 2,22 | 7,35E-05   |
| FITM2      | 13,06  | 29,43   | 2,25 | 0,00030111 |
| RILPL1     | 25,43  | 57,65   | 2,27 | 8,70E-06   |
| ENDOG      | 22,17  | 51,25   | 2,31 | 2,75E-05   |
| ABHD11     | 17,51  | 40,45   | 2,31 | 0,00021618 |
| SDHA       | 127,59 | 297,51  | 2,33 | 0,00030738 |
| COX5A      | 432,88 | 1012,9  | 2,34 | 8,37E-05   |
| MPC1       | 118,13 | 277,08  | 2,35 | 2,82E-05   |
| TMEM53     | 12,02  | 28,4    | 2,36 | 1,27E-06   |
| PPP1R3C    | 67,49  | 159,5   | 2,36 | 1,31E-05   |
| KLHL13     | 5,09   | 12,05   | 2,37 | 5,45E-06   |

|               |         |         |      |            |
|---------------|---------|---------|------|------------|
| TLE6          | 4,95    | 11,75   | 2,37 | 6,27E-05   |
| AFAP1L1       | 16,55   | 39,32   | 2,38 | 0,00011475 |
| FGF12         | 36,96   | 88,37   | 2,39 | 2,91E-05   |
| STARD4        | 50,57   | 121,58  | 2,4  | 4,66E-05   |
| FAM195A       | 63,46   | 152,64  | 2,41 | 0,0001851  |
| GOT2          | 99,43   | 245,39  | 2,47 | 0,0002385  |
| RP11-6N17.4   | 28,67   | 72,18   | 2,52 | 0,00042349 |
| MIR1307       | 81,84   | 206,78  | 2,53 | 0,00029227 |
| DUSP5         | 44,61   | 116,65  | 2,61 | 7,09E-05   |
| COMTD1        | 12,01   | 31,5    | 2,62 | 0,00014194 |
| PACSIN1       | 3,47    | 9,29    | 2,68 | 0,00042533 |
| MORN4         | 17,7    | 47,74   | 2,7  | 7,51E-05   |
| SYT11         | 3,15    | 8,57    | 2,72 | 6,71E-05   |
| GOT1          | 191,25  | 529,11  | 2,77 | 3,58E-05   |
| IDH3A         | 136,74  | 378,3   | 2,77 | 0,00010455 |
| RP11-475J5.6  | 20,52   | 57,01   | 2,78 | 1,22E-05   |
| RP11-660L16.2 | 6,09    | 17,17   | 2,82 | 2,61E-05   |
| GADD45G       | 20,44   | 62,57   | 3,06 | 0,0004229  |
| RAPGEF4       | 3,88    | 11,99   | 3,09 | 7,41E-05   |
| RILP          | 12,31   | 38,2    | 3,1  | 0,00010795 |
| PNCK          | 15,11   | 48,48   | 3,21 | 0,00016203 |
| CHCHD10       | 314,08  | 1014,59 | 3,23 | 1,73E-05   |
| AP000350.8    | 10,15   | 32,86   | 3,24 | 2,05E-05   |
| EEF1A2        | 112,84  | 367,79  | 3,26 | 2,90E-05   |
| GIPR          | 3,89    | 12,68   | 3,26 | 0,0002193  |
| TMEM38A       | 6,43    | 21,54   | 3,35 | 2,59E-06   |
| AP000351.3    | 5,25    | 17,64   | 3,36 | 8,94E-05   |
| PSMC1         | 2,41    | 8,25    | 3,42 | 9,82E-07   |
| MYOZ1         | 6,01    | 20,83   | 3,47 | 0,00019206 |
| RPL7P3        | 3,82    | 13,59   | 3,56 | 2,07E-05   |
| DUSP26        | 10,95   | 39,39   | 3,6  | 0,00019209 |
| SNAP91        | 11,01   | 39,59   | 3,6  | 0,00023111 |
| TNNI3K        | 21,11   | 80,66   | 3,82 | 0,00025841 |
| ART5          | 2,06    | 7,92    | 3,84 | 3,93E-05   |
| RASGRP3       | 9,82    | 38,18   | 3,89 | 4,68E-06   |
| BDH1          | 11,16   | 43,99   | 3,94 | 2,69E-05   |
| RP11-432J24.5 | 11,26   | 45,48   | 4,04 | 2,88E-06   |
| SLC29A2       | 7,62    | 32,42   | 4,25 | 0,00014185 |
| CHMP4C        | 3,06    | 12,99   | 4,25 | 0,00014614 |
| CRYAB         | 1445,89 | 6233,3  | 4,31 | 0,00026375 |
| NPY6R         | 12,59   | 57,99   | 4,61 | 4,16E-05   |
| CKMT2         | 93,99   | 433,18  | 4,61 | 0,00024442 |
| RP11-549B18.3 | 2,2     | 10,17   | 4,62 | 4,28E-05   |
| SNORD14A      | 91,19   | 448,07  | 4,91 | 6,96E-05   |



|               |        |        |        |            |
|---------------|--------|--------|--------|------------|
| ATP1A3        | 4,96   | 24,62  | 4,96   | 4,99E-05   |
| PGAM2         | 49,71  | 260,43 | 5,24   | 6,46E-06   |
| RP11-480I12.5 | 1,81   | 9,61   | 5,31   | 7,03E-06   |
| RENBP         | 3,03   | 17,08  | 5,64   | 3,19E-05   |
| SCN5A         | 6,34   | 36,78  | 5,8    | 3,22E-05   |
| GLRXP3        | 0      | 5,66   | 6      | 7,25E-08   |
| CKM           | 157,42 | 957,67 | 6,08   | 0,00033542 |
| UNC13D        | 13,62  | 87,49  | 6,42   | 1,40E-05   |
| DOK7          | 1,9    | 13,79  | 7,26   | 3,13E-05   |
| RGN           | 1,33   | 10,18  | 7,65   | 0,00012894 |
| RP11-264A11.1 | 1,35   | 11,86  | 8,79   | 0,00016401 |
| SLC25A5P5     | 1,54   | 14,32  | 9,3    | 6,95E-06   |
| DUSP13        | 2,62   | 31,09  | 11,87  | 0,00029146 |
| RP11-350D17.3 | 0,77   | 9,39   | 12,19  | 3,76E-05   |
| MT1G          | 0,39   | 8,08   | 20,72  | 2,87E-05   |
| RP11-208G20.3 | 0      | 38,79  | 39     | 5,35E-14   |
| TDGF1         | 0,36   | 21,59  | 59,97  | 1,63E-08   |
| TDGF1P3       | 0,06   | 7,04   | 117,33 | 2,24E-07   |
| PZP           | 0,34   | 50,99  | 149,97 | 8,15E-09   |
| PSPHP1        | 0,33   | 81,56  | 247,15 | 2,48E-10   |
