# Supplementary material for: Danon Disease-Associated LAMP-2 Deficiency Drives Metabolic Signature Indicative of Mitochondrial Aging and Fibrosis in Cardiac Tissue and hiPSC-Derived Cardiomyocytes
Source: MDPI journal article supplement (doi:10.3390/jcm9082457), 2020-07-31
Supplement: s1 [file s1]

# Tissue Transcriptome analysis FDR <0.05

|          |      |     |     |          |     |      |     |
|----------|------|-----|-----|----------|-----|------|-----|
| >10      | 10-3 | 3-2 | 2-1 | 1-2      | 2-3 | 3-10 | >10 |
| DECREASE |      |     |     | INCREASE |     |      |     |

| Common_name | Control_mean | Danon_mean | Fold_change | P-value    |
|-------------|--------------|------------|-------------|------------|
| LAMP2       | 30,72        | 0,85       | -36,14      | 7,28E-06   |
| F5          | 5,94         | 0,31       | -19,16      | 0,00105    |
| CORIN       | 23,38        | 1,97       | -11,87      | 0,00025064 |
| SMTNL2      | 11,6         | 1,74       | -6,67       | 7,16E-05   |
| GRB14       | 11,83        | 2,23       | -5,3        | 0,00098974 |
| RP11-6F2.6  | 87,68        | 23,89      | -3,67       | 0,00103745 |
| GPR133      | 21,23        | 6,39       | -3,32       | 0,00028001 |
| PPIL1       | 52,05        | 19,81      | -2,63       | 5,74E-07   |
| ADCK3       | 150,46       | 59,69      | -2,52       | 0,00029619 |
| C15orf59    | 35,36        | 14,88      | -2,38       | 0,00037795 |
| WFS1        | 38,2         | 17,12      | -2,23       | 0,00021408 |
| RHOD        | 38,24        | 17,38      | -2,2        | 0,00045086 |
| PRDX6       | 244,51       | 117,5      | -2,08       | 0,00048693 |
| TEAD2       | 33,33        | 18,04      | -1,85       | 0,00010564 |
| SDCBP       | 94,19        | 55,09      | -1,71       | 0,000489   |
| CHPT1       | 87,92        | 53,52      | -1,64       | 0,00062752 |
| RCAN2       | 104,92       | 64,19      | -1,63       | 0,00053559 |
| KLC2        | 15,33        | 9,5        | -1,61       | 0,00032412 |
| PPPDE2      | 18,61        | 12,28      | -1,52       | 3,44E-05   |
| FBLIM1      | 31,76        | 21,35      | -1,49       | 0,00097569 |
| PMF1        | 54,8         | 42,95      | -1,28       | 0,00042346 |
| H2AFV       | 74,66        | 92,51      | 1,24        | 0,0003713  |
| MRFAP1L1    | 32,89        | 43,2       | 1,31        | 0,00027617 |
| KIAA1191    | 31,35        | 41,4       | 1,32        | 0,00091232 |
| SCO1        | 16,75        | 22,46      | 1,34        | 0,00018585 |
| VPS24       | 50,62        | 68,38      | 1,35        | 0,0007452  |
| GATA6       | 18,52        | 26,01      | 1,4         | 0,00074194 |
| TMEM106C    | 25,52        | 36,05      | 1,41        | 0,00031849 |
| BCL2L2      | 17,28        | 25         | 1,45        | 0,00093997 |
| MEAF6       | 20,23        | 29,7       | 1,47        | 0,00064068 |
| RAB12       | 34,88        | 53,73      | 1,54        | 0,00103041 |
| AC005840.1  | 11,78        | 19,62      | 1,67        | 0,00012758 |
| LETMD1      | 12,52        | 22,34      | 1,78        | 0,00062263 |
| PRMT2       | 30,3         | 54,9       | 1,81        | 0,00041614 |
| WEE1        | 16,7         | 33,41      | 2           | 0,0003435  |
| DDIT3       | 18,17        | 37,23      | 2,05        | 0,00065846 |
| SOCS2       | 9,75         | 20,25      | 2,08        | 0,00017838 |
| LYPLAL1     | 28,56        | 62,07      | 2,17        | 0,00039265 |
| CHCHD6      | 5,77         | 13,01      | 2,25        | 7,02E-05   |
| KCNJ4       | 10,97        | 24,83      | 2,26        | 0,00077827 |

|           |       |        |       |            |
|-----------|-------|--------|-------|------------|
| ARHGAP24  | 5,4   | 12,48  | 2,31  | 0,00072325 |
| C14orf135 | 6,75  | 16,32  | 2,42  | 0,00055355 |
| IFI44L    | 4,28  | 10,81  | 2,53  | 0,0004469  |
| JAK2      | 3,79  | 10,42  | 2,75  | 0,00069494 |
| GATM      | 6,82  | 20,5   | 3,01  | 0,00105578 |
| FEZ1      | 20,66 | 64,54  | 3,12  | 0,00049485 |
| MAL       | 2,57  | 8,07   | 3,14  | 0,00080498 |
| GADD45A   | 23,72 | 75,7   | 3,19  | 0,00084384 |
| FAM69C    | 3,31  | 10,6   | 3,2   | 0,00013241 |
| GPNMB     | 82,66 | 307,47 | 3,72  | 0,00010673 |
| IDI2-AS1  | 6,71  | 27,8   | 4,14  | 0,00016254 |
| GADD45G   | 21,95 | 100,32 | 4,57  | 0,00098244 |
| HCN2      | 4,71  | 22,61  | 4,8   | 4,31E-05   |
| CCL5      | 1,38  | 8,89   | 6,44  | 0,00054022 |
| CENPA     | 0,62  | 9,1    | 14,68 | 3,98E-05   |
| BIRC7     | 0,18  | 7,57   | 42,06 | 1,22E-05   |
