# Supplementary material for: Danon Disease-Associated LAMP-2 Deficiency Drives Metabolic Signature Indicative of Mitochondrial Aging and Fibrosis in Cardiac Tissue and hiPSC-Derived Cardiomyocytes
Source: MDPI journal article supplement (doi:10.3390/jcm9082457), 2020-07-31
Supplement: s1 [file s1]

hiPS-CM Metabolome analysis MEDIUM

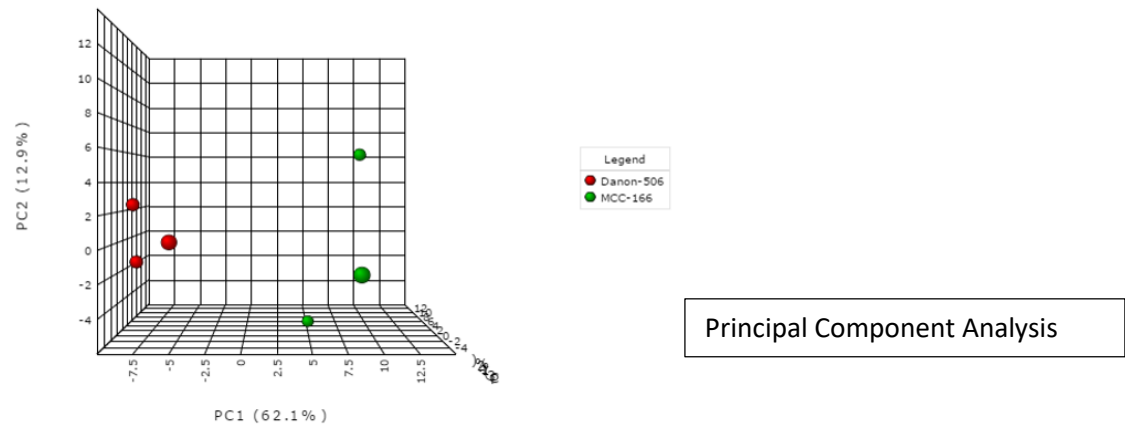

RAW DATA

| N. | compound     | CmpdID | Pathway     | parent   | med Rt | Polarit y | MCC-166_Controls |          |          | Danon-506 |          |          | MEDIAN   |          | FOLD CHANGE | p-value |
|----|--------------|--------|-------------|----------|--------|-----------|------------------|----------|----------|-----------|----------|----------|----------|----------|-------------|---------|
|    |              |        |             |          |        |           | M1               | M2       | M3       | D1        | D2       | D3       | M        | D        | Danon/MC C  |         |
| 1  | L-alanine    | C00041 | Amino acids | 90,0559  | 1,20   | +         | 3,79E+07         | 3,86E+07 | 4,97E+07 | 4,91E+07  | 5,37E+07 | 4,84E+07 | 3,86E+07 | 4,91E+07 | 1,27        | 0,12    |
| 2  | L-arginine   | C00062 | Amino acids | 175,1194 | 1,18   | +         | 1,29E+08         | 1,28E+08 | 1,17E+08 | 1,50E+08  | 1,60E+08 | 1,70E+08 | 1,28E+08 | 1,60E+08 | 1,25        | 0,01    |
| 3  | L-asparagine | C00152 | Amino acids | 133,0612 | 1,20   | +         | 3,87E+06         | 4,18E+06 | 4,53E+06 | 5,07E+06  | 4,16E+06 | 4,85E+06 | 4,18E+06 | 4,85E+06 | 1,16        | 0,21    |
| 4  | L-aspartate  | C00049 | Amino acids | 134,0452 | 1,22   | +         | 4,52E+05         | 4,54E+05 | 3,78E+05 | 7,96E+05  | 8,66E+05 | 9,16E+05 | 4,52E+05 | 8,66E+05 | 1,92        | 0,00    |
| 5  | L-cysteine   | C00097 | Amino acids | 122,0276 | 1,23   | +         | 1,32E+06         | 1,30E+06 | 1,23E+06 | 4,35E+06  | 3,80E+06 | 4,03E+06 | 1,30E+06 | 4,03E+06 | 3,10        | 0,00    |
| 6  | L-glutamate  | C00025 | Amino acids | 148,0608 | 1,21   | +         | 7,38E+06         | 7,14E+06 | 6,55E+06 | 2,03E+07  | 2,42E+07 | 2,43E+07 | 7,14E+06 | 2,42E+07 | 3,39        | 0,00    |
| 7  | L-glutamine  | C00064 | Amino acids | 147,0768 | 1,20   | +         | 3,68E+07         | 4,28E+07 | 5,04E+07 | 2,78E+07  | 1,74E+07 | 1,50E+07 | 4,28E+07 | 1,74E+07 | 0,41        | 0,01    |
| 8  | glycine      | C00037 | Amino acids | 76,0403  | 1,22   | +         | 3,06E+06         | 2,87E+06 | 3,70E+06 | 4,81E+06  | 5,42E+06 | 5,22E+06 | 3,06E+06 | 5,22E+06 | 1,71        | 0,00    |
| 9  | L-histidine  | C00135 | Amino acids | 156,0771 | 1,11   | +         | 6,25E+06         | 5,45E+06 | 5,79E+06 | 5,15E+06  | 6,25E+06 | 5,27E+06 | 5,79E+06 | 5,27E+06 | 0,91        | 0,55    |
| 10 | L-leucine    | C00123 | Amino acids | 132,1023 | 1,24   | +         | 2,37E+08         | 2,00E+08 | 3,13E+08 | 1,85E+08  | 1,81E+08 | 1,78E+08 | 2,37E+08 | 1,81E+08 | 0,76        | 0,11    |
| 11 | L-lysine     | C00047 | Amino acids | 147,1131 | 1,10   | +         | 2,68E+07         | 2,11E+07 | 2,38E+07 | 2,43E+07  | 2,14E+07 | 2,49E+07 | 2,38E+07 | 2,43E+07 | 1,02        | 0,86    |
| 12 | L-methionine | C00073 | Amino acids | 150,0577 | 1,24   | +         | 2,53E+07         | 2,01E+07 | 2,93E+07 | 2,24E+07  | 2,27E+07 | 2,35E+07 | 2,53E+07 | 2,27E+07 | 0,90        | 0,48    |

|    |                           |        |             |              |      |   |              |              |              |              |              |              |              |              |      |      |
|----|---------------------------|--------|-------------|--------------|------|---|--------------|--------------|--------------|--------------|--------------|--------------|--------------|--------------|------|------|
| 13 | L-phenylalanine           | C00079 | Amino acids | 166,08<br>61 | 1,24 | + | 4,06E+<br>07 | 3,58E+<br>07 | 3,89E+<br>07 | 3,65E+<br>07 | 4,03E+<br>07 | 3,54E+<br>07 | 3,89E+<br>07 | 3,65E+<br>07 | 0,94 | 0,65 |
| 14 | L-proline                 | C00148 | Amino acids | 116,07<br>12 | 1,23 | + | 1,67E+<br>08 | 1,52E+<br>08 | 2,08E+<br>08 | 2,27E+<br>08 | 2,34E+<br>08 | 2,11E+<br>08 | 1,67E+<br>08 | 2,27E+<br>08 | 1,36 | 0,05 |
| 15 | L-serine                  | C00065 | Amino acids | 106,05<br>06 | 1,20 | + | 1,62E+<br>06 | 1,68E+<br>06 | 1,64E+<br>06 | 1,33E+<br>06 | 1,04E+<br>06 | 1,25E+<br>06 | 1,64E+<br>06 | 1,25E+<br>06 | 0,76 | 0,01 |
| 16 | L-threonine               | C00188 | Amino acids | 120,06<br>61 | 1,21 | + | 6,06E+<br>06 | 6,69E+<br>06 | 8,38E+<br>06 | 7,39E+<br>06 | 7,02E+<br>06 | 6,47E+<br>06 | 6,69E+<br>06 | 7,02E+<br>06 | 1,05 | 0,92 |
| 17 | L-tryptophan              | C00078 | Amino acids | 205,09<br>76 | 1,34 | + | 6,80E+<br>06 | 9,35E+<br>06 | 4,74E+<br>06 | 2,80E+<br>06 | 4,97E+<br>06 | 4,41E+<br>06 | 6,80E+<br>06 | 4,41E+<br>06 | 0,65 | 0,12 |
| 18 | L-tyrosine                | C00082 | Amino acids | 182,08<br>15 | 1,24 | + | 2,04E+<br>07 | 1,80E+<br>07 | 2,43E+<br>07 | 1,80E+<br>07 | 2,08E+<br>07 | 2,08E+<br>07 | 2,04E+<br>07 | 2,08E+<br>07 | 1,02 | 0,65 |
| 19 | L-valine                  | C00183 | Amino acids | 118,08<br>69 | 1,24 | + | 5,42E+<br>07 | 4,64E+<br>07 | 7,07E+<br>07 | 4,60E+<br>07 | 4,48E+<br>07 | 4,65E+<br>07 | 5,42E+<br>07 | 4,60E+<br>07 | 0,85 | 0,19 |
| 20 | L-cystine                 | C00491 | Amino acids | 241,03<br>10 | 1,24 | + | 1,99E+<br>06 | 2,17E+<br>06 | 2,56E+<br>06 | 1,59E+<br>06 | 1,17E+<br>06 | 1,10E+<br>06 | 2,17E+<br>06 | 1,17E+<br>06 | 0,54 | 0,01 |
| 21 | ADP                       | C00008 | Nucleotides | 426,02<br>32 | 1,48 | - | 7,71E+<br>03 | 2,65E+<br>03 | 2,73E+<br>03 | 3,41E+<br>03 | 4,52E+<br>03 | 1,10E+<br>03 | 2,73E+<br>03 | 3,41E+<br>03 | 1,25 | 0,53 |
| 22 | AMP                       | C00020 | Nucleotides | 348,07<br>10 | 1,26 | + | 4,92E+<br>03 | 0,00E+<br>00 | 5,84E+<br>03 | 3,93E+<br>04 | 4,41E+<br>04 | 2,93E+<br>04 | 4,92E+<br>03 | 3,93E+<br>04 | 7,98 | 0,00 |
| 23 | Adenosine                 | C00212 | Nucleotides | 268,10<br>44 | 1,27 | + | 3,82E+<br>03 | 0,00E+<br>00 | 5,44E+<br>03 | 4,60E+<br>03 | 7,07E+<br>03 | 9,44E+<br>03 | 3,82E+<br>03 | 7,07E+<br>03 | 1,85 | 0,14 |
| 24 | Adenine                   | C00147 | Nucleotides | 136,06<br>22 | 1,24 | + | 1,15E+<br>06 | 1,34E+<br>06 | 1,49E+<br>06 | 1,27E+<br>06 | 1,13E+<br>06 | 1,23E+<br>06 | 1,34E+<br>06 | 1,23E+<br>06 | 0,92 | 0,35 |
| 25 | Guanine                   | C00242 | Nucleotides | 152,05<br>71 | 1,25 | + | 1,37E+<br>04 | 0,00E+<br>00 | 1,69E+<br>04 | 0,00E+<br>00 | 0,00E+<br>00 | 8,60E+<br>03 | 1,37E+<br>04 | 0,00E+<br>00 | 0,00 | 0,28 |
| 26 | Cytidine                  | C00475 | Nucleotides | 244,09<br>32 | 1,24 | + | 7,29E+<br>04 | 6,73E+<br>04 | 7,52E+<br>04 | 2,18E+<br>05 | 2,06E+<br>05 | 2,58E+<br>05 | 7,29E+<br>04 | 2,18E+<br>05 | 2,99 | 0,00 |
| 27 | Cytosine                  | C00380 | Nucleotides | 112,05<br>13 | 1,24 | + | 1,57E+<br>05 | 1,09E+<br>05 | 1,30E+<br>05 | 3,95E+<br>05 | 4,38E+<br>05 | 7,01E+<br>05 | 1,30E+<br>05 | 4,38E+<br>05 | 3,37 | 0,02 |
| 28 | Thymine                   | C00178 | Nucleotides | 127,05<br>07 | 1,23 | + | 1,41E+<br>05 | 1,86E+<br>05 | 1,49E+<br>05 | 1,30E+<br>05 | 8,49E+<br>04 | 1,25E+<br>05 | 1,49E+<br>05 | 1,25E+<br>05 | 0,83 | 0,08 |
| 29 | UDP                       | C00015 | Nucleotides | 405,01<br>03 | 1,79 | + | 2,15E+<br>03 | 0,00E+<br>00 | 5,88E+<br>04 | 2,78E+<br>04 | 2,16E+<br>03 | 1,82E+<br>03 | 2,15E+<br>03 | 2,16E+<br>03 | 1,00 | 0,67 |
| 30 | Hypoxanthine              | C00262 | Nucleotides | 137,04<br>62 | 1,25 | + | 1,19E+<br>06 | 1,22E+<br>06 | 1,82E+<br>06 | 1,01E+<br>06 | 7,46E+<br>05 | 3,01E+<br>05 | 1,22E+<br>06 | 7,46E+<br>05 | 0,61 | 0,07 |
| 31 | Xanthine                  | C00385 | Nucleotides | 151,02<br>53 | 1,59 | - | 2,15E+<br>05 | 2,43E+<br>05 | 1,39E+<br>05 | 1,63E+<br>05 | 1,15E+<br>05 | 9,26E+<br>04 | 2,15E+<br>05 | 1,15E+<br>05 | 0,53 | 0,11 |
| 32 | Allantoate                | C00499 | Nucleotides | 177,06<br>13 | 1,13 | + | 5,03E+<br>06 | 4,33E+<br>06 | 7,77E+<br>06 | 2,80E+<br>06 | 2,42E+<br>06 | 2,14E+<br>06 | 5,03E+<br>06 | 2,42E+<br>06 | 0,48 | 0,04 |
| 33 | 5-Hydroxyisourate         | C11821 | Nucleotides | 185,03<br>02 | 1,08 | + | 1,09E+<br>03 | 0,00E+<br>00 | 4,72E+<br>03 | 3,13E+<br>03 | 4,72E+<br>03 | 1,16E+<br>03 | 1,09E+<br>03 | 3,13E+<br>03 | 2,86 | 0,58 |
| 34 | Urate                     | C00366 | Nucleotides | 167,02<br>15 | 1,24 | - | 1,77E+<br>05 | 1,98E+<br>05 | 1,78E+<br>05 | 1,11E+<br>05 | 1,26E+<br>05 | 1,15E+<br>05 | 1,78E+<br>05 | 1,15E+<br>05 | 0,65 | 0,00 |
| 35 | 5-6-Dihydrothymine        | C00906 | Nucleotides | 129,06<br>64 | 1,23 | + | 1,40E+<br>06 | 1,21E+<br>06 | 1,53E+<br>06 | 1,50E+<br>06 | 1,55E+<br>06 | 1,54E+<br>06 | 1,40E+<br>06 | 1,54E+<br>06 | 1,10 | 0,20 |
| 36 | Pyridoxal                 | C00250 | Nucleotides | 168,06<br>59 | 1,24 | + | 2,09E+<br>06 | 2,05E+<br>06 | 2,26E+<br>06 | 1,56E+<br>06 | 1,37E+<br>06 | 1,61E+<br>06 | 2,09E+<br>06 | 1,56E+<br>06 | 0,75 | 0,00 |
| 37 | 4-Pyridoxate              | C00847 | Nucleotides | 184,06<br>01 | 1,26 | + | 3,40E+<br>04 | 1,20E+<br>04 | 1,79E+<br>04 | 9,47E+<br>03 | 2,37E+<br>05 | 1,67E+<br>05 | 1,79E+<br>04 | 1,67E+<br>05 | 9,32 | 0,16 |
| 38 | Pyridoxamine 5'-phosphate | C00647 | Nucleotides | 249,06<br>24 | 1,24 | + | 8,88E+<br>05 | 1,12E+<br>06 | 5,17E+<br>05 | 2,79E+<br>05 | 4,47E+<br>05 | 4,65E+<br>05 | 8,88E+<br>05 | 4,47E+<br>05 | 0,50 | 0,07 |
| 39 | Nicotinamide              | C00153 | Nucleotides | 123,05<br>58 | 1,25 | + | 5,72E+<br>06 | 5,07E+<br>06 | 5,42E+<br>06 | 3,81E+<br>05 | 3,61E+<br>05 | 3,94E+<br>05 | 5,42E+<br>06 | 3,81E+<br>05 | 0,07 | 0,00 |

|    |                                                  |        |                              |              |      |   |              |              |              |              |              |              |              |              |         |      |
|----|--------------------------------------------------|--------|------------------------------|--------------|------|---|--------------|--------------|--------------|--------------|--------------|--------------|--------------|--------------|---------|------|
| 40 | Nicotinate ribonucleotide                        | C01185 | Nucleotides                  | 335,04<br>57 | 1,13 | - | 4,15E+<br>04 | 3,97E+<br>04 | 7,39E+<br>04 | 2,49E+<br>04 | 2,16E+<br>04 | 2,71E+<br>04 | 4,15E+<br>04 | 2,49E+<br>04 | 0,60    | 0,07 |
| 41 | Phosphate                                        | C00009 | Phosphates                   | 98,985<br>0  | 1,25 | + | 6,03E+<br>07 | 6,46E+<br>07 | 6,90E+<br>07 | 6,46E+<br>07 | 5,97E+<br>07 | 5,64E+<br>07 | 6,46E+<br>07 | 5,97E+<br>07 | 0,92    | 0,27 |
| 42 | Diphosphate                                      | C00013 | Phosphates                   | 176,93<br>53 | 1,27 | - | 2,95E+<br>06 | 3,45E+<br>06 | 3,04E+<br>06 | 3,08E+<br>06 | 2,68E+<br>06 | 3,09E+<br>06 | 3,04E+<br>06 | 3,08E+<br>06 | 1,01    | 0,39 |
| 43 | D-Glucose                                        | C00031 | Glycolysis                   | 179,05<br>59 | 1,18 | - | 8,12E+<br>04 | 5,19E+<br>04 | 4,13E+<br>04 | 2,31E+<br>05 | 1,91E+<br>05 | 3,12E+<br>05 | 5,19E+<br>04 | 2,31E+<br>05 | 4,46    | 0,01 |
| 44 | D-Glucose 6-phosphate                            | C02965 | Glycolysis                   | 259,02<br>28 | 1,27 | - | 4,48E+<br>04 | 3,01E+<br>04 | 2,04E+<br>04 | 4,81E+<br>04 | 2,70E+<br>04 | 4,06E+<br>04 | 3,01E+<br>04 | 4,06E+<br>04 | 1,35    | 0,51 |
| 45 | D-Fructose 1-6-bisphosphate                      | C00354 | Glycolysis                   | 338,98<br>92 | 1,64 | - | 4,27E+<br>03 | 4,03E+<br>03 | 1,41E+<br>04 | 2,86E+<br>04 | 1,19E+<br>04 | 7,26E+<br>03 | 4,27E+<br>03 | 1,19E+<br>04 | 2,79    | 0,31 |
| 46 | D-Glyceraldehyde 3-phosphate/Glycerone phosphate | C00118 | Glycolysis                   | 168,98<br>91 | 1,27 | - | 5,05E+<br>04 | 4,58E+<br>04 | 5,90E+<br>04 | 7,07E+<br>04 | 5,75E+<br>04 | 8,66E+<br>04 | 5,05E+<br>04 | 7,07E+<br>04 | 1,40    | 0,10 |
| 47 | 2/3-Phospho-D-glycerate                          | C00631 | Glycolysis                   | 184,98<br>51 | 1,31 | - | 6,49E+<br>04 | 7,66E+<br>04 | 1,11E+<br>05 | 8,78E+<br>04 | 7,54E+<br>04 | 1,06E+<br>05 | 7,66E+<br>04 | 8,78E+<br>04 | 1,15    | 0,76 |
| 48 | Phosphoenolpyruvate                              | C00074 | Glycolysis                   | 166,97<br>44 | 1,40 | - | 5,50E+<br>03 | 3,58E+<br>03 | 6,40E+<br>03 | 7,57E+<br>03 | 3,15E+<br>03 | 7,67E+<br>03 | 5,50E+<br>03 | 7,57E+<br>03 | 1,38    | 0,60 |
| 49 | Pyruvate                                         | C00022 | Glycolysis                   | 87,007<br>4  | 1,36 | - | 4,69E+<br>06 | 4,58E+<br>06 | 5,41E+<br>06 | 4,99E+<br>06 | 5,82E+<br>06 | 5,68E+<br>06 | 4,69E+<br>06 | 5,68E+<br>06 | 1,21    | 0,18 |
| 50 | Lactate                                          | C01432 | Glycolysis                   | 89,023<br>0  | 1,28 | - | 1,69E+<br>08 | 1,76E+<br>08 | 1,91E+<br>08 | 1,20E+<br>08 | 1,27E+<br>08 | 1,08E+<br>08 | 1,76E+<br>08 | 1,20E+<br>08 | 0,68    | 0,00 |
| 51 | Maltose                                          | C00208 | Other sugars                 | 343,12<br>36 | 1,17 | + | 1,95E+<br>04 | 1,65E+<br>04 | 8,01E+<br>03 | 0,00E+<br>00 | 1,91E+<br>04 | 3,28E+<br>04 | 1,65E+<br>04 | 1,91E+<br>04 | 1,16    | 0,81 |
| 52 | Citrate                                          | C00158 | TCA cycle                    | 191,01<br>94 | 1,26 | - | 6,13E+<br>06 | 7,04E+<br>06 | 9,12E+<br>06 | 2,10E+<br>07 | 2,15E+<br>07 | 2,18E+<br>07 | 7,04E+<br>06 | 2,15E+<br>07 | 3,05    | 0,00 |
| 53 | 2-Oxoglutarate                                   | C00026 | TCA cycle                    | 145,01<br>43 | 1,28 | - | 5,25E+<br>05 | 5,41E+<br>05 | 5,10E+<br>05 | 1,32E+<br>06 | 1,36E+<br>06 | 1,34E+<br>06 | 5,25E+<br>05 | 1,34E+<br>06 | 2,54    | 0,00 |
| 54 | Succinate                                        | C00042 | TCA cycle                    | 117,01<br>81 | 1,29 | - | 4,91E+<br>05 | 4,22E+<br>05 | 7,41E+<br>05 | 4,65E+<br>05 | 3,79E+<br>05 | 4,11E+<br>05 | 4,91E+<br>05 | 4,11E+<br>05 | 0,84    | 0,25 |
| 55 | Fumarate                                         | C00122 | TCA cycle                    | 115,00<br>25 | 1,29 | - | 2,17E+<br>05 | 2,16E+<br>05 | 3,20E+<br>05 | 3,43E+<br>05 | 3,56E+<br>05 | 4,08E+<br>05 | 2,17E+<br>05 | 3,56E+<br>05 | 1,64    | 0,04 |
| 56 | Malate                                           | C00149 | TCA cycle                    | 133,01<br>31 | 1,28 | - | 1,64E+<br>06 | 1,82E+<br>06 | 2,65E+<br>06 | 3,28E+<br>06 | 3,91E+<br>06 | 3,59E+<br>06 | 1,82E+<br>06 | 3,59E+<br>06 | 1,97    | 0,01 |
| 57 | 2-Hydroxyglutarate/Citramalate                   | C02630 | Alternative Carboxylic acids | 147,02<br>91 | 1,25 | - | 1,83E+<br>05 | 2,00E+<br>05 | 2,68E+<br>05 | 5,67E+<br>05 | 5,89E+<br>05 | 4,54E+<br>05 | 2,00E+<br>05 | 5,67E+<br>05 | 2,83    | 0,00 |
| 58 | Sedoheptulose 7-phosphate                        | C05382 | Pentose Phosphate Pathway    | 289,03<br>46 | 1,28 | - | 3,80E+<br>03 | 7,99E+<br>03 | 3,69E+<br>03 | 2,00E+<br>04 | 1,00E+<br>04 | 2,30E+<br>04 | 3,80E+<br>03 | 2,00E+<br>04 | 5,26    | 0,04 |
| 59 | Pentose phosphates (isobars)                     | C00199 | Pentose Phosphate Pathway    | 229,01<br>17 | 1,26 | - | 4,78E+<br>04 | 9,02E+<br>04 | 1,04E+<br>05 | 9,21E+<br>04 | 5,94E+<br>04 | 6,34E+<br>04 | 9,02E+<br>04 | 6,34E+<br>04 | 0,70    | 0,68 |
| 60 | Glutathione                                      | C00051 | GSH homeostasis              | 308,09<br>16 | 1,25 | + | 1,21E+<br>04 | 0,00E+<br>00 | #DIV/0! | 0,37 |
| 61 | 5-Oxoproline                                     | C01879 | GSH homeostasis              | 130,05<br>03 | 1,23 | + | 1,01E+<br>08 | 9,58E+<br>07 | 9,91E+<br>07 | 8,11E+<br>07 | 7,76E+<br>07 | 7,31E+<br>07 | 9,91E+<br>07 | 7,76E+<br>07 | 0,78    | 0,00 |
| 62 | S-Glutathionyl-L-cysteine                        | C05526 | GSH homeostasis              | 427,09<br>63 | 1,23 | + | 7,46E+<br>03 | 0,00E+<br>00 | 3,86E+<br>03 | 6,43E+<br>03 | 0,00E+<br>00 | 0,00E+<br>00 | 3,86E+<br>03 | 0,00E+<br>00 | 0,00    | 0,62 |
| 63 | Cys-Gly                                          | C01419 | GSH homeostasis              | 179,04<br>89 | 1,24 | + | 1,48E+<br>04 | 0,00E+<br>00 | #DIV/0! | 0,37 |
| 64 | Ascorbate                                        | C00072 | GSH homeostasis              | 175,02<br>61 | 1,23 | - | 4,42E+<br>04 | 4,59E+<br>04 | 3,37E+<br>04 | 7,38E+<br>04 | 9,26E+<br>04 | 9,37E+<br>04 | 4,42E+<br>04 | 9,26E+<br>04 | 2,09    | 0,00 |
| 65 | Dehydroascorbate                                 | C05422 | GSH homeostasis              | 173,00<br>88 | 1,25 | - | 6,90E+<br>05 | 7,65E+<br>05 | 9,89E+<br>05 | 1,84E+<br>06 | 1,98E+<br>06 | 1,74E+<br>06 | 7,65E+<br>05 | 1,84E+<br>06 | 2,40    | 0,00 |
| 66 | gamma-L-Glutamyl-D-alanine                       | C03738 | Gamma-glutamyls              | 219,09<br>83 | 1,25 | + | 1,36E+<br>04 | 4,29E+<br>04 | 1,64E+<br>04 | 1,50E+<br>04 | 3,70E+<br>04 | 1,84E+<br>04 | 1,64E+<br>04 | 1,84E+<br>04 | 1,12    | 0,94 |
| 67 | gamma-Glutamyl-gamma-aminobutyrate               | C15767 | Gamma-glutamyls              | 233,11<br>43 | 1,25 | + | 5,00E+<br>04 | 3,92E+<br>04 | 2,37E+<br>04 | 6,68E+<br>04 | 2,41E+<br>04 | 3,14E+<br>04 | 3,92E+<br>04 | 3,14E+<br>04 | 0,80    | 0,85 |

|    |                                       |        |                                               |              |      |   |              |              |              |              |              |              |              |              |         |      |
|----|---------------------------------------|--------|-----------------------------------------------|--------------|------|---|--------------|--------------|--------------|--------------|--------------|--------------|--------------|--------------|---------|------|
| 68 | gamma-L-Glutamylputrescine            | C15699 | Gamma-glutamyls                               | 218,15<br>06 | 1,09 | + | 1,20E+<br>03 | 0,00E+<br>00 | 1,19E+<br>03 | 0,00E+<br>00 | 0,00E+<br>00 | 0,00E+<br>00 | 1,19E+<br>03 | 0,00E+<br>00 | 0,00    | 0,12 |
| 69 | (5-L-Glutamyl)-L-glutamine            | C05283 | Gamma-glutamyls                               | 276,11<br>96 | 1,23 | + | 1,18E+<br>05 | 1,51E+<br>05 | 1,25E+<br>05 | 6,05E+<br>04 | 7,78E+<br>04 | 3,03E+<br>04 | 1,25E+<br>05 | 6,05E+<br>04 | 0,48    | 0,01 |
| 70 | Dimethylglycine                       | C01026 | Serine biosynthesis and one-carbon metabolism | 104,07<br>14 | 1,29 | + | 1,32E+<br>06 | 5,74E+<br>05 | 4,24E+<br>05 | 2,99E+<br>05 | 3,12E+<br>05 | 3,27E+<br>05 | 5,74E+<br>05 | 3,12E+<br>05 | 0,54    | 0,17 |
| 71 | 3-Phosphonopyruvate                   | C02798 | Serine biosynthesis and one-carbon metabolism | 168,99<br>01 | 1,40 | + | 3,72E+<br>03 | 2,65E+<br>03 | 5,79E+<br>03 | 1,58E+<br>04 | 1,02E+<br>04 | 9,76E+<br>03 | 3,72E+<br>03 | 1,02E+<br>04 | 2,73    | 0,02 |
| 72 | Ornithine                             | C01602 | Urea cycle                                    | 133,09<br>76 | 1,10 | + | 1,63E+<br>07 | 1,38E+<br>07 | 2,07E+<br>07 | 8,94E+<br>06 | 6,67E+<br>06 | 7,16E+<br>06 | 1,63E+<br>07 | 7,16E+<br>06 | 0,44    | 0,01 |
| 73 | L-Citrulline                          | C00327 | Urea cycle                                    | 176,10<br>35 | 1,21 | + | 1,57E+<br>04 | 0,00E+<br>00 | 0,00E+<br>00 | 0,00E+<br>00 | 0,00E+<br>00 | 1,92E+<br>04 | 0,00E+<br>00 | 0,00E+<br>00 | #DIV/0! | 0,89 |
| 74 | Putrescine                            | C00134 | Polyamines                                    | 89,108<br>1  | 1,15 | + | 1,48E+<br>07 | 1,45E+<br>07 | 2,23E+<br>07 | 1,87E+<br>07 | 1,33E+<br>07 | 1,01E+<br>07 | 1,48E+<br>07 | 1,33E+<br>07 | 0,90    | 0,43 |
| 75 | Spermidine                            | C00315 | Polyamines                                    | 146,16<br>55 | 1,13 | + | 6,64E+<br>05 | 4,86E+<br>05 | 5,99E+<br>05 | 1,71E+<br>06 | 2,32E+<br>06 | 2,29E+<br>06 | 5,99E+<br>05 | 2,29E+<br>06 | 3,83    | 0,00 |
| 76 | Spermine                              | C00750 | Polyamines                                    | 203,22<br>34 | 1,15 | + | 5,00E+<br>04 | 2,67E+<br>04 | 5,02E+<br>04 | 7,73E+<br>04 | 4,72E+<br>04 | 4,75E+<br>04 | 5,00E+<br>04 | 4,75E+<br>04 | 0,95    | 0,30 |
| 77 | N-Acetylneuraminate                   | C00270 | Aminosugars                                   | 310,11<br>38 | 1,21 | + | 3,58E+<br>03 | 0,00E+<br>00 | 2,94E+<br>03 | 1,52E+<br>03 | 2,66E+<br>03 | 4,09E+<br>03 | 2,94E+<br>03 | 2,66E+<br>03 | 0,91    | 0,68 |
| 78 | 5-Guanidino-2-oxopentanoate           | C03771 | Arginine and proline metabolism               | 174,08<br>79 | 1,24 | + | 7,69E+<br>04 | 5,24E+<br>04 | 9,54E+<br>04 | 1,16E+<br>05 | 1,68E+<br>05 | 1,66E+<br>05 | 7,69E+<br>04 | 1,66E+<br>05 | 2,16    | 0,02 |
| 79 | Phosphocreatine                       | C02305 | Arginine and proline metabolism               | 212,04<br>34 | 1,27 | + | 5,86E+<br>03 | 1,47E+<br>04 | 4,94E+<br>03 | 4,04E+<br>03 | 4,61E+<br>03 | 0,00E+<br>00 | 5,86E+<br>03 | 4,04E+<br>03 | 0,69    | 0,18 |
| 80 | Creatine                              | C00300 | Arginine and proline metabolism               | 132,07<br>72 | 1,23 | + | 4,16E+<br>06 | 2,73E+<br>06 | 2,92E+<br>06 | 7,62E+<br>05 | 7,48E+<br>05 | 5,53E+<br>05 | 2,92E+<br>06 | 7,48E+<br>05 | 0,26    | 0,00 |
| 81 | Creatinine                            | C00791 | Arginine and proline metabolism               | 114,06<br>68 | 1,22 | + | 2,08E+<br>05 | 1,92E+<br>05 | 2,88E+<br>05 | 3,99E+<br>04 | 5,49E+<br>04 | 3,84E+<br>04 | 2,08E+<br>05 | 3,99E+<br>04 | 0,19    | 0,00 |
| 82 | Guanidinoacetate                      | C00581 | Arginine and proline metabolism               | 118,06<br>17 | 1,22 | + | 2,19E+<br>04 | 1,29E+<br>04 | 5,97E+<br>04 | 1,04E+<br>05 | 4,76E+<br>05 | 4,72E+<br>05 | 2,19E+<br>04 | 4,72E+<br>05 | 21,54   | 0,06 |
| 83 | trans-4-Hydroxy-L-proline             | C01157 | Arginine and proline metabolism               | 132,06<br>60 | 1,21 | + | 1,56E+<br>07 | 1,89E+<br>07 | 2,13E+<br>07 | 2,11E+<br>07 | 2,01E+<br>07 | 1,94E+<br>07 | 1,89E+<br>07 | 2,01E+<br>07 | 1,06    | 0,41 |
| 84 | 5-Aminopentanoate                     | C00431 | Arginine and proline metabolism               | 118,08<br>69 | 1,64 | + | 3,03E+<br>06 | 2,82E+<br>06 | 2,86E+<br>06 | 2,85E+<br>06 | 2,88E+<br>06 | 0,00E+<br>00 | 2,86E+<br>06 | 2,85E+<br>06 | 1,00    | 0,36 |
| 85 | L-1-Pyrroline-3-hydroxy-5-carboxylate | C04281 | Arginine and proline metabolism               | 130,05<br>03 | 1,80 | + | 2,50E+<br>07 | 2,11E+<br>07 | 2,21E+<br>07 | 2,02E+<br>07 | 1,99E+<br>07 | 1,93E+<br>07 | 2,21E+<br>07 | 1,99E+<br>07 | 0,90    | 0,07 |
| 86 | Pantothenol                           | C00864 | Panthothenate metabolism                      | 220,11<br>84 | 1,33 | + | 6,00E+<br>05 | 5,43E+<br>05 | 5,88E+<br>05 | 5,39E+<br>05 | 5,98E+<br>05 | 5,34E+<br>05 | 5,88E+<br>05 | 5,39E+<br>05 | 0,92    | 0,50 |
| 87 | Pantetheine                           | C00831 | Panthothenate metabolism                      | 279,13<br>55 | 1,26 | + | 1,05E+<br>04 | 2,72E+<br>03 | 0,00E+<br>00 | 0,00E+<br>00 | 0,00E+<br>00 | 0,00E+<br>00 | 2,72E+<br>03 | 0,00E+<br>00 | 0,00    | 0,23 |
| 88 | Taurine                               | C00245 | Sulfur metabolism                             | 126,02<br>24 | 1,25 | + | 5,20E+<br>03 | 2,09E+<br>03 | 0,00E+<br>00 | 0,00E+<br>00 | 0,00E+<br>00 | 0,00E+<br>00 | 2,09E+<br>03 | 0,00E+<br>00 | 0,00    | 0,18 |
| 89 | Hypotaurine                           | C00519 | Sulfur metabolism                             | 110,02<br>77 | 1,20 | + | 3,92E+<br>04 | 1,63E+<br>04 | 1,28E+<br>04 | 0,00E+<br>00 | 0,00E+<br>00 | 0,00E+<br>00 | 1,63E+<br>04 | 0,00E+<br>00 | 0,00    | 0,05 |
| 90 | 3-Sulfino-L-alanine                   | C00606 | Sulfur metabolism                             | 152,00<br>14 | 1,21 | - | 1,02E+<br>04 | 9,71E+<br>03 | 1,14E+<br>04 | 1,10E+<br>04 | 4,40E+<br>03 | 5,99E+<br>03 | 1,02E+<br>04 | 5,99E+<br>03 | 0,59    | 0,18 |
| 91 | L-Cysteate                            | C00506 | Sulfur metabolism                             | 170,01<br>28 | 1,69 | + | 1,18E+<br>05 | 1,28E+<br>05 | 1,42E+<br>05 | 1,15E+<br>05 | 9,55E+<br>04 | 1,07E+<br>05 | 1,28E+<br>05 | 1,07E+<br>05 | 0,84    | 0,06 |
| 92 | L-Methionine S-oxide                  | C02989 | Sulfur metabolism                             | 166,05<br>37 | 1,51 | + | 1,01E+<br>07 | 8,16E+<br>06 | 9,34E+<br>06 | 8,37E+<br>06 | 8,54E+<br>06 | 9,05E+<br>06 | 9,34E+<br>06 | 8,54E+<br>06 | 0,91    | 0,41 |
| 93 | Indole                                | C00463 | Indole and Tryptophan                         | 118,06<br>57 | 1,27 | + | 4,41E+<br>05 | 5,10E+<br>05 | 4,39E+<br>05 | 4,31E+<br>05 | 4,76E+<br>05 | 4,70E+<br>05 | 4,41E+<br>05 | 4,70E+<br>05 | 1,06    | 0,88 |
| 94 | kynurenine                            | C00328 | Indole and Tryptophan                         | 209,09<br>24 | 1,25 | + | 1,46E+<br>04 | 0,00E+<br>00 | 1,07E+<br>04 | 1,48E+<br>06 | 1,49E+<br>06 | 1,43E+<br>06 | 1,07E+<br>04 | 1,48E+<br>06 | 138,36  | 0,00 |
| 95 | N-formyl kynurenine                   | C02700 | Indole and Tryptophan                         | 237,08<br>73 | 1,25 | + | 1,23E+<br>04 | 4,49E+<br>03 | 0,00E+<br>00 | 1,29E+<br>05 | 8,46E+<br>04 | 1,18E+<br>05 | 4,49E+<br>03 | 1,18E+<br>05 | 26,26   | 0,00 |

|         |                                   |               |                                     |              |      |   |              |              |              |              |              |              |              |              |         |      |
|---------|-----------------------------------|---------------|-------------------------------------|--------------|------|---|--------------|--------------|--------------|--------------|--------------|--------------|--------------|--------------|---------|------|
| 96      | Glycerol 3-phosphate              | C00093        | Glycerophospholipid biosynthesis    | 173,02<br>13 | 1,27 | + | 4,31E+<br>04 | 3,09E+<br>04 | 3,74E+<br>04 | 3,58E+<br>04 | 2,47E+<br>04 | 2,48E+<br>04 | 3,74E+<br>04 | 2,48E+<br>04 | 0,66    | 0,16 |
| 97      | Ethanolamine phosphate            | C00346        | Glycerophospholipid biosynthesis    | 142,02<br>68 | 1,23 | + | 5,27E+<br>04 | 7,44E+<br>04 | 5,03E+<br>04 | 1,18E+<br>05 | 1,21E+<br>05 | 1,07E+<br>05 | 5,27E+<br>04 | 1,18E+<br>05 | 2,25    | 0,00 |
| 98      | N-Methylethanolamine phosphate    | C01210        | Glycerophospholipid biosynthesis    | 156,04<br>25 | 1,13 | + | 8,22E+<br>04 | 6,48E+<br>04 | 5,91E+<br>04 | 6,89E+<br>04 | 7,05E+<br>04 | 4,92E+<br>04 | 6,48E+<br>04 | 6,89E+<br>04 | 1,06    | 0,58 |
| 99      | sn-glycero-3-Phosphoethanolamine  | C01233        | Glycerophospholipid biosynthesis    | 216,06<br>29 | 1,22 | + | 2,21E+<br>04 | 8,10E+<br>03 | 0,00E+<br>00 | 0,00E+<br>00 | 3,10E+<br>04 | 7,33E+<br>04 | 8,10E+<br>03 | 3,10E+<br>04 | 3,83    | 0,33 |
| 10<br>0 | L-Carnitine                       | C00318        | Carnitine and fatty acid metabolsim | 162,11<br>28 | 1,22 | + | 5,65E+<br>07 | 5,20E+<br>07 | 6,38E+<br>07 | 5,09E+<br>07 | 6,29E+<br>07 | 7,23E+<br>07 | 5,65E+<br>07 | 6,29E+<br>07 | 1,11    | 0,55 |
| 10<br>1 | propionyl-carnitine               | HMDB008<br>24 | Carnitine and fatty acid metabolsim | 218,13<br>92 | 1,25 | + | 1,40E+<br>06 | 1,12E+<br>06 | 1,09E+<br>06 | 4,67E+<br>06 | 7,47E+<br>06 | 8,78E+<br>06 | 1,12E+<br>06 | 7,47E+<br>06 | 6,66    | 0,01 |
| 10<br>2 | butanoyl-l-carnitine              | HMDB007<br>36 | Carnitine and fatty acid metabolsim | 232,15<br>48 | 1,25 | + | 6,63E+<br>05 | 5,09E+<br>05 | 4,16E+<br>05 | 1,47E+<br>06 | 1,01E+<br>06 | 1,04E+<br>06 | 5,09E+<br>05 | 1,04E+<br>06 | 2,04    | 0,02 |
| 10<br>3 | acyl-C4-OH                        | HMDB131<br>27 | Carnitine and fatty acid metabolsim | 248,14<br>98 | 1,27 | + | 5,98E+<br>03 | 3,49E+<br>04 | 1,19E+<br>04 | 3,37E+<br>04 | 3,74E+<br>04 | 2,90E+<br>04 | 1,19E+<br>04 | 3,37E+<br>04 | 2,84    | 0,16 |
| 10<br>4 | acyl-C5-OH                        | ac107         | Carnitine and fatty acid metabolsim | 262,16<br>54 | 1,25 | + | 1,10E+<br>05 | 9,75E+<br>04 | 1,38E+<br>05 | 2,45E+<br>05 | 3,10E+<br>05 | 3,92E+<br>05 | 1,10E+<br>05 | 3,10E+<br>05 | 2,83    | 0,01 |
| 10<br>5 | Acetyl phosphate                  | C00227        | Other                               | 140,99<br>57 | 1,45 | + | 4,72E+<br>04 | 7,52E+<br>04 | 7,62E+<br>04 | 7,69E+<br>04 | 6,36E+<br>04 | 7,39E+<br>04 | 7,52E+<br>04 | 7,39E+<br>04 | 0,98    | 0,64 |
| 10<br>6 | 1-Hydroxy-2-aminoethylphosphonate | C05678        | Other                               | 142,02<br>68 | 1,23 | + | 5,27E+<br>04 | 7,44E+<br>04 | 5,03E+<br>04 | 1,18E+<br>05 | 1,21E+<br>05 | 1,07E+<br>05 | 5,27E+<br>04 | 1,18E+<br>05 | 2,25    | 0,00 |
| 10<br>7 | 2-Methyleneglutarate              | C02930        | Other                               | 145,04<br>99 | 1,30 | + | 2,70E+<br>04 | 2,88E+<br>04 | 2,15E+<br>04 | 7,29E+<br>04 | 7,42E+<br>04 | 9,51E+<br>04 | 2,70E+<br>04 | 7,42E+<br>04 | 2,74    | 0,00 |
| 10<br>8 | 4-Aminobenzoate                   | C00568        | Other                               | 138,05<br>53 | 1,89 | + | 9,97E+<br>04 | 8,45E+<br>04 | 1,06E+<br>05 | 9,90E+<br>04 | 8,80E+<br>04 | 9,33E+<br>04 | 9,97E+<br>04 | 9,33E+<br>04 | 0,94    | 0,66 |
| 10<br>9 | beta-Butoxyethyl nicotinate       | C13138        | Other                               | 224,12<br>86 | 1,24 | + | 8,10E+<br>04 | 1,14E+<br>05 | 1,27E+<br>05 | 1,31E+<br>05 | 1,42E+<br>05 | 1,68E+<br>05 | 1,14E+<br>05 | 1,42E+<br>05 | 1,24    | 0,09 |
| 11<br>0 | 3-Oxalomalate                     | C01990        | Other                               | 207,01<br>47 | 1,20 | + | 1,57E+<br>06 | 1,53E+<br>06 | 1,69E+<br>06 | 8,00E+<br>05 | 5,31E+<br>05 | 4,88E+<br>05 | 1,57E+<br>06 | 5,31E+<br>05 | 0,34    | 0,00 |
| 11<br>1 | D-glucono-1,5-lactone             | C00198        | Other                               | 179,05<br>50 | 1,09 | + | 8,95E+<br>03 | 3,43E+<br>03 | 3,28E+<br>03 | 6,85E+<br>03 | 6,90E+<br>03 | 1,24E+<br>04 | 3,43E+<br>03 | 6,90E+<br>03 | 2,01    | 0,25 |
| 11<br>2 | 2-Dehydro-3-deoxy-D-glucarate     | C03921        | Other                               | 193,03<br>50 | 1,58 | + | 1,01E+<br>05 | 6,81E+<br>04 | 7,66E+<br>04 | 2,23E+<br>05 | 0,00E+<br>00 | 0,00E+<br>00 | 7,66E+<br>04 | 0,00E+<br>00 | 0,00    | 0,93 |
| 11<br>3 | Ferric gluconate                  | C13511        | Other                               | 196,05<br>81 | 1,10 | + | 0,00E+<br>00 | 0,00E+<br>00 | 4,06E+<br>03 | 1,81E+<br>03 | 3,01E+<br>03 | 4,52E+<br>03 | 0,00E+<br>00 | 3,01E+<br>03 | #DIV/0! | 0,32 |
| 11<br>4 | 6-Thioxanthine 5--monophosphate   | C16618        | Other                               | 381,02<br>37 | 1,13 | + | 9,49E+<br>05 | 9,12E+<br>05 | 1,18E+<br>06 | 4,14E+<br>05 | 4,91E+<br>05 | 3,93E+<br>05 | 9,49E+<br>05 | 4,14E+<br>05 | 0,44    | 0,00 |
| 11<br>5 | Deoxyribose triphosphate          | C12347        | Other                               | 374,96<br>49 | 1,15 | + | 5,09E+<br>05 | 5,15E+<br>05 | 5,85E+<br>05 | 2,93E+<br>05 | 2,68E+<br>05 | 2,64E+<br>05 | 5,15E+<br>05 | 2,68E+<br>05 | 0,52    | 0,00 |
| 11<br>6 | Riboflavin                        | C00255        | Other                               | 377,14<br>74 | 1,26 | + | 3,69E+<br>05 | 4,50E+<br>05 | 5,50E+<br>05 | 6,35E+<br>05 | 5,22E+<br>05 | 4,44E+<br>05 | 4,50E+<br>05 | 5,22E+<br>05 | 1,16    | 0,37 |
| 11<br>7 | N-Amidino-L-aspartate             | C03139        | Other                               | 176,06<br>62 | 1,25 | + | 5,30E+<br>06 | 4,73E+<br>06 | 5,70E+<br>06 | 3,58E+<br>06 | 3,33E+<br>06 | 3,00E+<br>06 | 5,30E+<br>06 | 3,33E+<br>06 | 0,63    | 0,00 |
| 11<br>8 | threo-3-Hydroxy-L-aspartate       | C11511        | Other                               | 150,03<br>88 | 1,49 | + | 5,94E+<br>05 | 5,82E+<br>05 | 6,16E+<br>05 | 6,28E+<br>05 | 6,40E+<br>05 | 6,28E+<br>05 | 5,94E+<br>05 | 6,28E+<br>05 | 1,06    | 0,03 |
| 11<br>9 | N-Carbamyl-L-glutamate            | C05829        | Other                               | 191,06<br>73 | 1,21 | + | 1,27E+<br>04 | 3,71E+<br>03 | 1,54E+<br>03 | 1,37E+<br>04 | 7,51E+<br>03 | 2,21E+<br>04 | 3,71E+<br>03 | 1,37E+<br>04 | 3,70    | 0,19 |
