# Supplementary material for: Danon Disease-Associated LAMP-2 Deficiency Drives Metabolic Signature Indicative of Mitochondrial Aging and Fibrosis in Cardiac Tissue and hiPSC-Derived Cardiomyocytes
Source: MDPI journal article supplement (doi:10.3390/jcm9082457), 2020-07-31
Supplement: s1 [file s1]

hiPS-CM Metabolome analysis CELLS

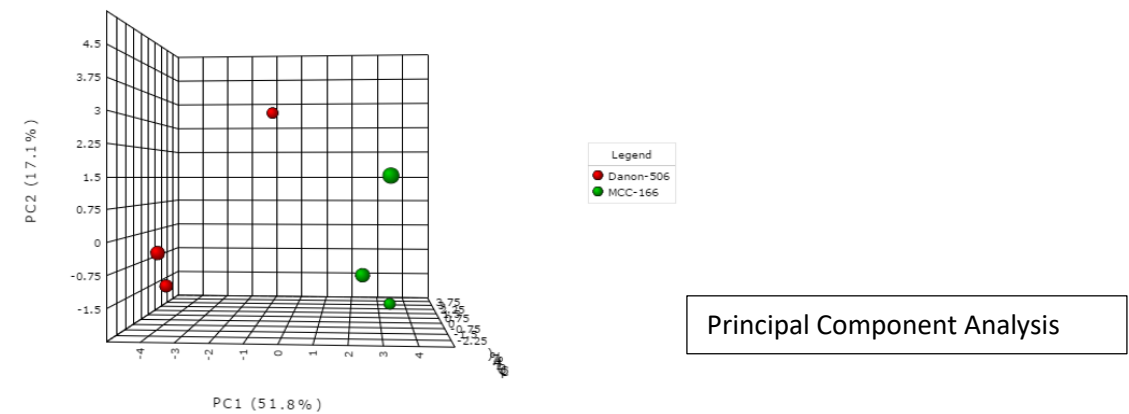

RAW DATA

| N. | compound     | CmpdID | Pathway     | parent   | medRt | Po<br>lar<br>ity | MCC-166_CONTROLS |          |          | Danon-506 |          |          | MEDIAN   |          | FOLD<br>CHANGE | p-<br>value |
|----|--------------|--------|-------------|----------|-------|------------------|------------------|----------|----------|-----------|----------|----------|----------|----------|----------------|-------------|
|    |              |        |             |          |       |                  | M1               | M2       | M3       | D1        | D2       | D3       | M        | D        | Danon/M<br>CC  | M           |
| 1  | L-alanine    | C00041 | Amino acids | 90,0559  | 1,20  | +                | 9,51E+05         | 8,01E+05 | 7,97E+05 | 1,73E+06  | 2,13E+06 | 2,03E+06 | 8,01E+05 | 2,03E+06 | 2,53           | 0,00        |
| 2  | L-arginine   | C00062 | Amino acids | 175,1194 | 1,18  | +                | 6,99E+06         | 6,40E+06 | 6,81E+06 | 9,68E+06  | 7,09E+06 | 1,02E+07 | 6,81E+06 | 9,68E+06 | 1,42           | 0,08        |
| 3  | L-asparagine | C00152 | Amino acids | 133,0612 | 1,20  | +                | 2,18E+05         | 3,36E+05 | 2,89E+05 | 5,42E+05  | 8,44E+05 | 1,07E+06 | 2,89E+05 | 8,44E+05 | 2,92           | 0,03        |
| 4  | L-aspartate  | C00049 | Amino acids | 134,0452 | 1,22  | +                | 3,76E+05         | 4,09E+05 | 3,52E+05 | 1,59E+06  | 1,55E+06 | 1,66E+06 | 3,76E+05 | 1,59E+06 | 4,23           | 0,00        |
| 5  | L-cysteine   | C00097 | Amino acids | 122,0276 | 1,23  | +                | 2,23E+05         | 3,27E+05 | 3,45E+05 | 6,99E+05  | 9,73E+05 | 1,13E+06 | 3,27E+05 | 9,73E+05 | 2,97           | 0,01        |
| 6  | L-glutamate  | C00025 | Amino acids | 148,0608 | 1,21  | +                | 1,14E+07         | 1,60E+07 | 1,92E+07 | 9,04E+07  | 1,01E+08 | 1,29E+08 | 1,60E+07 | 1,01E+08 | 6,31           | 0,00        |
| 7  | L-glutamine  | C00064 | Amino acids | 147,0768 | 1,20  | +                | 9,50E+05         | 1,71E+06 | 1,85E+06 | 1,49E+06  | 2,46E+06 | 5,13E+06 | 1,71E+06 | 2,46E+06 | 1,44           | 0,25        |
| 8  | glycine      | C00037 | Amino acids | 76,0403  | 1,22  | +                | 4,10E+06         | 3,68E+06 | 4,16E+06 | 3,73E+06  | 4,63E+06 | 4,90E+06 | 4,10E+06 | 4,63E+06 | 1,13           | 0,32        |
| 9  | L-histidine  | C00135 | Amino acids | 156,0771 | 1,11  | +                | 2,53E+05         | 3,06E+05 | 3,23E+05 | 7,20E+05  | 1,01E+06 | 8,03E+05 | 3,06E+05 | 8,03E+05 | 2,62           | 0,00        |
| 10 | L-leucine    | C00123 | Amino acids | 132,1023 | 1,24  | +                | 9,71E+06         | 1,44E+07 | 1,07E+07 | 2,66E+07  | 3,12E+07 | 3,01E+07 | 1,07E+07 | 3,01E+07 | 2,81           | 0,00        |
| 11 | L-lysine     | C00047 | Amino acids | 147,1131 | 1,10  | +                | 1,14E+06         | 1,38E+06 | 1,34E+06 | 2,71E+06  | 2,90E+06 | 2,69E+06 | 1,34E+06 | 2,71E+06 | 2,02           | 0,00        |

|    |                 |        |             |          |      |   |          |          |          |          |          |          |          |          |       |      |
|----|-----------------|--------|-------------|----------|------|---|----------|----------|----------|----------|----------|----------|----------|----------|-------|------|
| 12 | L-methionine    | C00073 | Amino acids | 150,0577 | 1,24 | + | 1,93E+05 | 2,74E+05 | 5,96E+05 | 1,19E+06 | 1,32E+06 | 1,20E+06 | 2,74E+05 | 1,20E+06 | 4,39  | 0,00 |
| 13 | L-phenylalanine | C00079 | Amino acids | 166,0861 | 1,24 | + | 8,45E+05 | 1,29E+06 | 3,49E+04 | 3,07E+04 | 2,92E+06 | 2,51E+04 | 8,45E+05 | 3,07E+04 | 0,04  | 0,81 |
| 14 | L-proline       | C00148 | Amino acids | 116,0712 | 1,23 | + | 8,57E+06 | 2,13E+07 | 1,82E+07 | 4,79E+07 | 8,99E+07 | 1,00E+08 | 1,82E+07 | 8,99E+07 | 4,94  | 0,02 |
| 15 | L-serine        | C00065 | Amino acids | 106,0506 | 1,20 | + | 2,36E+05 | 1,97E+05 | 2,49E+05 | 4,86E+05 | 5,29E+05 | 6,40E+05 | 2,36E+05 | 5,29E+05 | 2,25  | 0,00 |
| 16 | L-threonine     | C00188 | Amino acids | 120,0661 | 1,21 | + | 3,18E+05 | 4,06E+05 | 5,02E+05 | 8,00E+05 | 9,71E+05 | 1,13E+06 | 4,06E+05 | 9,71E+05 | 2,39  | 0,01 |
| 17 | L-tryptophan    | C00078 | Amino acids | 205,0976 | 1,34 | + | 6,28E+05 | 2,08E+05 | 1,05E+05 | 8,51E+04 | 5,39E+05 | 1,38E+05 | 2,08E+05 | 1,38E+05 | 0,66  | 0,79 |
| 18 | L-tyrosine      | C00082 | Amino acids | 182,0815 | 1,24 | + | 1,56E+06 | 2,38E+06 | 2,04E+06 | 4,86E+06 | 4,73E+06 | 4,99E+06 | 2,04E+06 | 4,86E+06 | 2,38  | 0,00 |
| 19 | L-valine        | C00183 | Amino acids | 118,0869 | 1,24 | + | 4,93E+06 | 5,74E+06 | 7,48E+06 | 1,13E+07 | 1,08E+07 | 1,18E+07 | 5,74E+06 | 1,13E+07 | 1,97  | 0,00 |
| 20 | L-cystine       | C00491 | Amino acids | 241,0310 | 1,24 | + | 2,14E+04 | 1,61E+04 | 1,53E+04 | 3,73E+04 | 6,91E+04 | 3,90E+04 | 1,61E+04 | 3,90E+04 | 2,42  | 0,04 |
| 21 | ADP             | C00008 | Nucleotides | 426,0232 | 1,48 | - | 3,68E+05 | 3,48E+05 | 2,63E+05 | 9,62E+05 | 4,42E+06 | 4,23E+06 | 3,48E+05 | 4,23E+06 | 12,18 | 0,06 |
| 22 | AMP             | C00020 | Nucleotides | 348,0710 | 1,26 | + | 2,43E+06 | 1,04E+06 | 1,01E+06 | 4,44E+06 | 1,78E+07 | 1,29E+07 | 1,04E+06 | 1,29E+07 | 12,37 | 0,06 |
| 23 | dAMP            | C00360 | Nucleotides | 330,0548 | 1,26 | - | 0,00E+00 | 1,04E+04 | 1,00E+04 | 2,91E+04 | 2,98E+04 | 3,02E+04 | 1,00E+04 | 2,98E+04 | 2,97  | 0,00 |
| 24 | Adenosine       | C00212 | Nucleotides | 268,1044 | 1,27 | + | 3,04E+04 | 2,51E+04 | 4,71E+04 | 2,98E+04 | 1,46E+06 | 6,51E+05 | 3,04E+04 | 6,51E+05 | 21,45 | 0,18 |
| 25 | Adenine         | C00147 | Nucleotides | 136,0622 | 1,24 | + | 1,59E+06 | 1,58E+06 | 1,50E+06 | 1,67E+06 | 1,86E+06 | 1,86E+06 | 1,58E+06 | 1,86E+06 | 1,17  | 0,03 |
| 26 | GDP             | C00035 | Nucleotides | 442,0178 | 1,94 | - | 2,33E+04 | 2,70E+03 | 0,00E+00 | 3,44E+03 | 2,09E+05 | 2,43E+05 | 2,70E+03 | 2,09E+05 | 77,37 | 0,13 |
| 27 | GMP             | C00144 | Nucleotides | 364,0659 | 1,25 | + | 4,00E+05 | 2,41E+05 | 4,58E+05 | 4,34E+05 | 1,66E+06 | 9,90E+05 | 4,00E+05 | 9,90E+05 | 2,48  | 0,14 |
| 28 | Guanosine       | C00387 | Nucleotides | 284,0995 | 1,25 | + | 1,28E+04 | 3,21E+04 | 1,07E+05 | 2,45E+05 | 1,34E+05 | 1,26E+05 | 3,21E+04 | 1,34E+05 | 4,17  | 0,07 |
| 29 | Guanine         | C00242 | Nucleotides | 152,0571 | 1,25 | + | 1,21E+05 | 1,25E+05 | 1,89E+05 | 5,76E+05 | 3,79E+05 | 3,25E+05 | 1,25E+05 | 3,79E+05 | 3,04  | 0,02 |
| 30 | CDP             | C00112 | Nucleotides | 402,0115 | 1,34 | - | 3,32E+04 | 1,67E+04 | 1,82E+04 | 4,66E+04 | 1,31E+05 | 1,45E+05 | 1,82E+04 | 1,31E+05 | 7,19  | 0,05 |
| 31 | CMP             | C00055 | Nucleotides | 324,0599 | 1,25 | + | 1,98E+05 | 1,43E+05 | 2,39E+05 | 3,98E+05 | 4,12E+05 | 5,36E+05 | 1,98E+05 | 4,12E+05 | 2,08  | 0,01 |
| 32 | Cytidine        | C00475 | Nucleotides | 244,0932 | 1,24 | + | 3,72E+04 | 2,74E+04 | 1,14E+05 | 1,79E+05 | 5,71E+05 | 3,61E+05 | 3,72E+04 | 3,61E+05 | 9,73  | 0,06 |
| 33 | Cytosine        | C00380 | Nucleotides | 112,0513 | 1,24 | + | 9,74E+04 | 9,20E+04 | 1,74E+05 | 2,00E+05 | 4,55E+05 | 4,45E+05 | 9,74E+04 | 4,45E+05 | 4,56  | 0,05 |
| 34 | Thymine         | C00178 | Nucleotides | 127,0507 | 1,23 | + | 2,81E+04 | 5,38E+04 | 7,01E+04 | 5,27E+04 | 1,05E+05 | 1,16E+05 | 5,38E+04 | 1,05E+05 | 1,95  | 0,15 |
| 35 | UDP             | C00015 | Nucleotides | 405,0103 | 1,79 | + | 4,32E+05 | 2,71E+05 | 2,22E+05 | 8,60E+05 | 2,08E+06 | 2,26E+06 | 2,71E+05 | 2,08E+06 | 7,67  | 0,03 |
| 36 | IMP             | C00130 | Nucleotides | 349,0552 | 1,25 | + | 2,85E+05 | 1,04E+06 | 1,46E+06 | 4,63E+05 | 3,96E+05 | 2,96E+05 | 1,04E+06 | 3,96E+05 | 0,38  | 0,19 |

|    |                                                  |        |             |          |      |   |          |          |          |          |          |          |          |          |         |      |
|----|--------------------------------------------------|--------|-------------|----------|------|---|----------|----------|----------|----------|----------|----------|----------|----------|---------|------|
| 37 | Inosine                                          | C00294 | Nucleotides | 269,0885 | 1,25 | + | 3,96E+04 | 1,16E+05 | 2,44E+05 | 3,75E+05 | 1,29E+05 | 1,57E+05 | 1,16E+05 | 1,57E+05 | 1,34    | 0,43 |
| 38 | Hypoxanthine                                     | C00262 | Nucleotides | 137,0462 | 1,25 | + | 5,76E+05 | 1,20E+06 | 1,90E+06 | 2,87E+06 | 1,18E+06 | 1,41E+06 | 1,20E+06 | 1,41E+06 | 1,17    | 0,42 |
| 39 | Xanthine                                         | C00385 | Nucleotides | 151,0253 | 1,59 | - | 4,87E+03 | 4,77E+03 | 1,17E+04 | 2,61E+03 | 2,76E+03 | 5,49E+03 | 4,87E+03 | 2,76E+03 | 0,57    | 0,23 |
| 40 | Allantoate                                       | C00499 | Nucleotides | 177,0613 | 1,13 | + | 1,32E+05 | 1,55E+05 | 1,05E+05 | 3,17E+05 | 1,23E+05 | 1,44E+05 | 1,32E+05 | 1,44E+05 | 1,10    | 0,37 |
| 41 | (S)(+)-Allantoin                                 | C02350 | Nucleotides | 157,0358 | 1,24 | - | 4,38E+04 | 3,81E+04 | 7,48E+04 | 1,30E+05 | 8,66E+04 | 9,47E+04 | 4,38E+04 | 9,47E+04 | 2,16    | 0,04 |
| 42 | 5-Hydroxyisourate                                | C11821 | Nucleotides | 185,0302 | 1,08 | + | 6,69E+03 | 5,41E+03 | 1,06E+04 | 2,31E+04 | 1,80E+04 | 2,14E+04 | 6,69E+03 | 2,14E+04 | 3,21    | 0,00 |
| 43 | Urate                                            | C00366 | Nucleotides | 167,0215 | 1,24 | - | 1,03E+05 | 1,39E+05 | 2,15E+05 | 2,69E+05 | 2,19E+05 | 3,08E+05 | 1,39E+05 | 2,69E+05 | 1,94    | 0,05 |
| 44 | 5-6-Dihydrothymine                               | C00906 | Nucleotides | 129,0664 | 1,23 | + | 3,04E+05 | 6,31E+05 | 5,72E+05 | 2,28E+06 | 2,89E+06 | 4,03E+06 | 5,72E+05 | 2,89E+06 | 5,05    | 0,01 |
| 45 | Pyridoxal                                        | C00250 | Nucleotides | 168,0659 | 1,24 | + | 4,32E+04 | 2,38E+04 | 3,15E+04 | 7,17E+04 | 8,92E+04 | 6,68E+04 | 3,15E+04 | 7,17E+04 | 2,27    | 0,01 |
| 46 | 4-Pyridoxate                                     | C00847 | Nucleotides | 184,0601 | 1,26 | + | 0,00E+00 | 3,07E+03 | 1,82E+04 | 0,00E+00 | 5,19E+04 | 3,41E+04 | 3,07E+03 | 3,41E+04 | 11,11   | 0,25 |
| 47 | Pyridoxamine 5'-phosphate                        | C00647 | Nucleotides | 249,0624 | 1,24 | + | 8,28E+03 | 3,22E+03 | 3,61E+03 | 4,03E+03 | 3,15E+03 | 4,13E+03 | 3,61E+03 | 4,03E+03 | 1,11    | 0,49 |
| 48 | Nicotinamide                                     | C00153 | Nucleotides | 123,0558 | 1,25 | + | 1,32E+06 | 2,10E+06 | 1,78E+06 | 2,00E+06 | 2,92E+06 | 2,80E+06 | 1,78E+06 | 2,80E+06 | 1,57    | 0,08 |
| 49 | Nicotinate ribonucleotide                        | C01185 | Nucleotides | 335,0457 | 1,13 | - | 2,31E+03 | 0,00E+00 | 0,00E+00 | 8,89E+02 | 0,00E+00 | 0,00E+00 | 0,00E+00 | 0,00E+00 | #DIV/0! | 0,60 |
| 50 | UDP-glucose                                      | C00029 | Nucleotides | 567,0635 | 1,76 | + | 1,42E+03 | 3,51E+03 | 3,73E+03 | 2,19E+04 | 4,88E+04 | 6,06E+04 | 3,51E+03 | 4,88E+04 | 13,91   | 0,02 |
| 51 | ADP-D-ribose                                     | C01882 | Nucleotides | 560,0803 | 1,33 | + | 2,56E+04 | 3,01E+04 | 2,74E+04 | 3,04E+03 | 2,43E+03 | 3,02E+03 | 2,74E+04 | 3,02E+03 | 0,11    | 0,00 |
| 52 | NAD+                                             | C00003 | Nucleotides | 664,1177 | 1,24 | + | 5,05E+05 | 1,33E+06 | 9,56E+05 | 2,19E+06 | 2,96E+06 | 2,26E+06 | 9,56E+05 | 2,26E+06 | 2,36    | 0,01 |
| 53 | NADH                                             | C00004 | Nucleotides | 666,1332 | 1,86 | + | 4,05E+04 | 3,50E+04 | 4,88E+04 | 5,42E+04 | 7,91E+04 | 5,85E+04 | 4,05E+04 | 5,85E+04 | 1,44    | 0,06 |
| 54 | Phosphate                                        | C00009 | Phosphates  | 98,9850  | 1,25 | + | 9,46E+07 | 1,01E+08 | 9,56E+07 | 5,79E+07 | 7,08E+07 | 5,86E+07 | 9,56E+07 | 5,86E+07 | 0,61    | 0,00 |
| 55 | Diphosphate                                      | C00013 | Phosphates  | 176,9353 | 1,27 | - | 6,31E+06 | 5,73E+06 | 5,49E+06 | 4,11E+06 | 5,51E+06 | 4,93E+06 | 5,73E+06 | 4,93E+06 | 0,86    | 0,10 |
| 56 | D-Glucose                                        | C00031 | Glycolysis  | 179,0559 | 1,18 | - | 1,86E+04 | 1,17E+04 | 0,00E+00 | 9,24E+04 | 1,55E+05 | 2,50E+05 | 1,17E+04 | 1,55E+05 | 13,26   | 0,03 |
| 57 | D-Glucose 6-phosphate                            | C02965 | Glycolysis  | 259,0228 | 1,27 | - | 1,10E+05 | 1,08E+05 | 1,36E+05 | 2,11E+05 | 1,72E+05 | 1,98E+05 | 1,10E+05 | 1,98E+05 | 1,79    | 0,01 |
| 58 | D-Fructose 1-6-bisphosphate                      | C00354 | Glycolysis  | 338,9892 | 1,64 | - | 4,22E+06 | 4,15E+06 | 8,67E+06 | 1,28E+07 | 2,50E+06 | 6,83E+06 | 4,22E+06 | 6,83E+06 | 1,62    | 0,64 |
| 59 | D-Glyceraldehyde 3-phosphate/Glycerone phosphate | C00118 | Glycolysis  | 168,9891 | 1,27 | - | 1,74E+05 | 1,67E+05 | 2,30E+05 | 3,12E+05 | 1,55E+05 | 1,93E+05 | 1,74E+05 | 1,93E+05 | 1,11    | 0,59 |
| 60 | 2/3-Phospho-D-glycerate                          | C00631 | Glycolysis  | 184,9851 | 1,31 | - | 2,31E+06 | 2,13E+06 | 1,65E+06 | 2,48E+06 | 1,18E+06 | 1,24E+06 | 2,13E+06 | 1,24E+06 | 0,58    | 0,44 |
| 61 | Phosphoenolpyruvate                              | C00074 | Glycolysis  | 166,9744 | 1,40 | - | 1,39E+05 | 1,69E+05 | 1,65E+05 | 1,68E+05 | 7,80E+04 | 8,20E+04 | 1,65E+05 | 8,20E+04 | 0,50    | 0,19 |

|    |                                    |        |                                               |          |      |   |          |          |          |          |          |          |          |          |         |      |
|----|------------------------------------|--------|-----------------------------------------------|----------|------|---|----------|----------|----------|----------|----------|----------|----------|----------|---------|------|
| 62 | Pyruvate                           | C00022 | Glycolysis                                    | 87,0074  | 1,36 | - | 0,00E+00 | 0,00E+00 | 4,79E+05 | 0,00E+00 | 5,98E+05 | 5,03E+05 | 0,00E+00 | 5,03E+05 | #DIV/0! | 0,45 |
| 63 | Lactate                            | C01432 | Glycolysis                                    | 89,0230  | 1,28 | - | 1,84E+06 | 2,08E+06 | 2,06E+06 | 3,22E+06 | 3,42E+06 | 4,22E+06 | 2,06E+06 | 3,42E+06 | 1,66    | 0,01 |
| 64 | Maltose                            | C00208 | Other sugars                                  | 343,1236 | 1,17 | + | 1,70E+05 | 1,64E+05 | 2,39E+05 | 3,70E+05 | 2,36E+05 | 2,24E+05 | 1,70E+05 | 2,36E+05 | 1,38    | 0,18 |
| 65 | Citrate                            | C00158 | TCA cycle                                     | 191,0194 | 1,26 | - | 8,74E+05 | 1,39E+06 | 1,78E+06 | 2,86E+06 | 8,84E+06 | 9,88E+06 | 1,39E+06 | 8,84E+06 | 6,37    | 0,06 |
| 66 | 2-Oxoglutarate                     | C00026 | TCA cycle                                     | 145,0143 | 1,28 | - | 4,49E+04 | 4,88E+04 | 3,80E+04 | 2,92E+05 | 1,47E+06 | 1,03E+06 | 4,49E+04 | 1,03E+06 | 22,89   | 0,06 |
| 67 | Succinate                          | C00042 | TCA cycle                                     | 117,0181 | 1,29 | - | 9,68E+04 | 1,06E+05 | 1,28E+05 | 1,57E+05 | 2,11E+05 | 1,62E+05 | 1,06E+05 | 1,62E+05 | 1,53    | 0,03 |
| 68 | Fumarate                           | C00122 | TCA cycle                                     | 115,0025 | 1,29 | - | 6,91E+04 | 8,25E+04 | 7,88E+04 | 3,36E+05 | 6,15E+05 | 7,12E+05 | 7,88E+04 | 6,15E+05 | 7,80    | 0,01 |
| 69 | Malate                             | C00149 | TCA cycle                                     | 133,0131 | 1,28 | - | 8,74E+05 | 1,09E+06 | 1,04E+06 | 4,55E+06 | 9,58E+06 | 1,09E+07 | 1,04E+06 | 9,58E+06 | 9,19    | 0,02 |
| 70 | 2-Hydroxyglutarate/Citramalate     | C02630 | Alternative Carboxylic acids                  | 147,0291 | 1,25 | - | 1,01E+05 | 1,47E+05 | 1,19E+05 | 1,01E+06 | 1,69E+06 | 2,00E+06 | 1,19E+05 | 1,69E+06 | 14,24   | 0,01 |
| 71 | 6-Phospho-D-gluconate              | C00345 | Pentose Phosphate Pathway                     | 275,0180 | 1,29 | - | 1,73E+04 | 2,36E+04 | 2,49E+04 | 4,37E+04 | 4,37E+04 | 5,75E+04 | 2,36E+04 | 4,37E+04 | 1,85    | 0,01 |
| 72 | D-Erythrose 4-phosphate            | C00279 | Pentose Phosphate Pathway                     | 199,0009 | 1,25 | - | 2,80E+04 | 1,02E+05 | 1,04E+05 | 7,03E+04 | 8,13E+04 | 8,78E+04 | 1,02E+05 | 8,13E+04 | 0,80    | 0,94 |
| 73 | Sedoheptulose 7-phosphate          | C05382 | Pentose Phosphate Pathway                     | 289,0346 | 1,28 | - | 1,90E+03 | 0,00E+00 | 2,56E+03 | 4,89E+03 | 2,47E+04 | 2,95E+04 | 1,90E+03 | 2,47E+04 | 13,02   | 0,07 |
| 74 | Pentose phosphates (isobars)       | C00199 | Pentose Phosphate Pathway                     | 229,0117 | 1,26 | - | 8,46E+04 | 1,02E+05 | 1,06E+05 | 2,56E+05 | 1,48E+05 | 1,41E+05 | 1,02E+05 | 1,48E+05 | 1,45    | 0,09 |
| 75 | Glutathione                        | C00051 | GSH homeostasis                               | 308,0916 | 1,25 | + | 6,06E+06 | 1,17E+07 | 1,16E+07 | 2,21E+07 | 3,69E+07 | 3,07E+07 | 1,16E+07 | 3,07E+07 | 2,65    | 0,01 |
| 76 | 5-Oxoproline                       | C01879 | GSH homeostasis                               | 130,0503 | 1,23 | + | 3,15E+06 | 4,91E+06 | 5,22E+06 | 2,34E+07 | 2,71E+07 | 3,65E+07 | 4,91E+06 | 2,71E+07 | 5,51    | 0,00 |
| 77 | S-Glutathionyl-L-cysteine          | C05526 | GSH homeostasis                               | 427,0963 | 1,23 | + | 1,58E+04 | 9,53E+03 | 4,02E+04 | 5,90E+04 | 1,37E+04 | 4,61E+04 | 1,58E+04 | 4,61E+04 | 2,91    | 0,34 |
| 78 | Cys-Gly                            | C01419 | GSH homeostasis                               | 179,0489 | 1,24 | + | 1,07E+05 | 1,64E+05 | 1,59E+05 | 5,63E+05 | 8,53E+05 | 9,77E+05 | 1,59E+05 | 8,53E+05 | 5,37    | 0,01 |
| 79 | Ascorbate                          | C00072 | GSH homeostasis                               | 175,0261 | 1,23 | - | 0,00E+00 | 0,00E+00 | 3,66E+04 | 3,31E+04 | 3,49E+04 | 4,39E+04 | 0,00E+00 | 3,49E+04 | #DIV/0! | 0,12 |
| 80 | Dehydroascorbate                   | C05422 | GSH homeostasis                               | 173,0088 | 1,25 | - | 1,62E+04 | 2,40E+04 | 3,83E+04 | 5,28E+04 | 1,49E+05 | 1,42E+05 | 2,40E+04 | 1,42E+05 | 5,93    | 0,05 |
| 81 | gamma-L-Glutamyl-L-cysteine        | C00669 | Gamma-glutamyls                               | 251,0701 | 1,25 | + | 1,16E+04 | 3,35E+04 | 1,53E+04 | 1,12E+05 | 9,24E+04 | 8,10E+04 | 1,53E+04 | 9,24E+04 | 6,03    | 0,00 |
| 82 | gamma-L-Glutamyl-D-alanine         | C03738 | Gamma-glutamyls                               | 219,0983 | 1,25 | + | 4,26E+04 | 5,66E+04 | 5,39E+04 | 1,56E+05 | 1,38E+05 | 1,30E+05 | 5,39E+04 | 1,38E+05 | 2,57    | 0,00 |
| 83 | gamma-Glutamyl-gamma-aminobutyrate | C15767 | Gamma-glutamyls                               | 233,1143 | 1,25 | + | 2,15E+04 | 3,44E+04 | 9,90E+03 | 9,70E+04 | 1,47E+05 | 1,18E+05 | 2,15E+04 | 1,18E+05 | 5,50    | 0,00 |
| 84 | gamma-L-Glutamylputrescine         | C15699 | Gamma-glutamyls                               | 218,1506 | 1,09 | + | 3,69E+04 | 5,02E+04 | 3,07E+04 | 4,43E+04 | 4,62E+04 | 2,99E+04 | 3,69E+04 | 4,43E+04 | 1,20    | 0,92 |
| 85 | (5-L-Glutamyl)-L-glutamine         | C05283 | Gamma-glutamyls                               | 276,1196 | 1,23 | + | 2,77E+04 | 5,32E+04 | 6,62E+04 | 1,40E+05 | 2,25E+05 | 4,37E+05 | 5,32E+04 | 2,25E+05 | 4,23    | 0,07 |
| 86 | Dimethylglycine                    | C01026 | Serine biosynthesis and one-carbon metabolism | 104,0714 | 1,29 | + | 3,00E+05 | 4,72E+05 | 1,13E+06 | 3,33E+05 | 3,40E+05 | 3,31E+05 | 4,72E+05 | 3,33E+05 | 0,71    | 0,30 |

|     |                                       |        |                                               |          |      |   |          |          |          |          |          |          |          |          |         |      |
|-----|---------------------------------------|--------|-----------------------------------------------|----------|------|---|----------|----------|----------|----------|----------|----------|----------|----------|---------|------|
| 87  | Phosphoserine                         | C02532 | Serine biosynthesis and one-carbon metabolism | 186,0166 | 1,21 | + | 1,40E+04 | 5,74E+04 | 5,11E+04 | 4,16E+05 | 8,30E+05 | 7,86E+05 | 5,11E+04 | 7,86E+05 | 15,37   | 0,01 |
| 88  | S-Adenosyl-L-homocysteine             | C00021 | Serine biosynthesis and one-carbon metabolism | 385,1293 | 1,25 | + | 7,69E+03 | 3,56E+03 | 1,11E+04 | 9,15E+04 | 1,14E+05 | 1,03E+05 | 7,69E+03 | 1,03E+05 | 13,41   | 0,00 |
| 89  | S-Adenosyl-L-methionine               | C00019 | Serine biosynthesis and one-carbon metabolism | 399,1451 | 1,20 | + | 1,45E+04 | 5,82E+03 | 1,99E+04 | 2,43E+04 | 3,03E+04 | 4,01E+04 | 1,45E+04 | 3,03E+04 | 2,09    | 0,04 |
| 90  | 3-Phosphonopyruvate                   | C02798 | Serine biosynthesis and one-carbon metabolism | 168,9901 | 1,40 | + | 1,64E+05 | 1,89E+05 | 1,96E+05 | 2,01E+05 | 8,67E+04 | 7,75E+04 | 1,89E+05 | 8,67E+04 | 0,46    | 0,20 |
| 91  | Ornithine                             | C01602 | Urea cycle                                    | 133,0976 | 1,10 | + | 3,14E+05 | 3,42E+05 | 2,93E+05 | 8,77E+05 | 4,24E+05 | 3,96E+05 | 3,14E+05 | 4,24E+05 | 1,35    | 0,19 |
| 92  | L-Citrulline                          | C00327 | Urea cycle                                    | 176,1035 | 1,21 | + | 2,37E+04 | 1,81E+04 | 5,53E+04 | 8,03E+04 | 3,55E+04 | 6,62E+04 | 2,37E+04 | 6,62E+04 | 2,80    | 0,18 |
| 93  | Argininosuccinate                     | C03406 | Urea cycle                                    | 291,1303 | 1,20 | + | 0,00E+00 | 0,00E+00 | 3,28E+03 | 4,10E+04 | 4,62E+04 | 9,20E+04 | 0,00E+00 | 4,62E+04 | #DIV/0! | 0,02 |
| 94  | Putrescine                            | C00134 | Polyamines                                    | 89,1081  | 1,15 | + | 0,00E+00 | 0,00E+00 | 6,48E+05 | 3,16E+05 | 1,43E+06 | 0,00E+00 | 0,00E+00 | 3,16E+05 | #DIV/0! | 0,49 |
| 95  | Spermidine                            | C00315 | Polyamines                                    | 146,1655 | 1,13 | + | 3,31E+05 | 5,94E+05 | 1,23E+06 | 3,81E+06 | 1,04E+07 | 1,07E+07 | 5,94E+05 | 1,04E+07 | 17,48   | 0,03 |
| 96  | Spermine                              | C00750 | Polyamines                                    | 203,2234 | 1,15 | + | 4,81E+04 | 4,71E+04 | 1,40E+05 | 1,04E+05 | 2,49E+05 | 2,26E+05 | 4,81E+04 | 2,26E+05 | 4,71    | 0,10 |
| 97  | N-Acetylneuraminate                   | C00270 | Aminosugars                                   | 310,1138 | 1,21 | + | 7,46E+04 | 8,75E+04 | 1,11E+05 | 8,24E+05 | 7,05E+05 | 6,86E+05 | 8,75E+04 | 7,05E+05 | 8,07    | 0,00 |
| 98  | CMP-N-acetylneuraminate               | C00128 | Aminosugars                                   | 615,1558 | 1,24 | + | 5,68E+04 | 8,19E+04 | 9,24E+04 | 3,17E+05 | 2,86E+05 | 2,22E+05 | 8,19E+04 | 2,86E+05 | 3,49    | 0,00 |
| 99  | beta-L-Arabinose 1-phosphate          | C03906 | Aminosugars                                   | 231,0281 | 1,63 | + | 0,00E+00 | 1,50E+03 | 0,00E+00 | 1,59E+04 | 3,24E+04 | 1,58E+04 | 0,00E+00 | 1,59E+04 | #DIV/0! | 0,02 |
| 100 | 5-Guanidino-2-oxopentanoate           | C03771 | Arginine and proline metabolism               | 174,0879 | 1,24 | + | 0,00E+00 | 0,00E+00 | 0,00E+00 | 4,38E+03 | 1,48E+04 | 9,26E+03 | 0,00E+00 | 9,26E+03 | #DIV/0! | 0,03 |
| 101 | Phosphocreatine                       | C02305 | Arginine and proline metabolism               | 212,0434 | 1,27 | + | 2,88E+05 | 5,92E+05 | 4,30E+05 | 3,68E+05 | 2,09E+05 | 4,10E+05 | 4,30E+05 | 3,68E+05 | 0,86    | 0,37 |
| 102 | Creatine                              | C00300 | Arginine and proline metabolism               | 132,0772 | 1,23 | + | 6,36E+06 | 8,44E+06 | 1,21E+07 | 1,61E+07 | 1,95E+07 | 2,94E+07 | 8,44E+06 | 1,95E+07 | 2,31    | 0,04 |
| 103 | Creatinine                            | C00791 | Arginine and proline metabolism               | 114,0668 | 1,22 | + | 1,91E+05 | 2,13E+05 | 3,86E+05 | 7,28E+05 | 6,38E+05 | 8,56E+05 | 2,13E+05 | 7,28E+05 | 3,42    | 0,01 |
| 104 | N-Acetyl-L-citrulline                 | C15532 | Arginine and proline metabolism               | 218,1140 | 1,22 | + | 0,00E+00 | 0,00E+00 | 4,98E+03 | 2,09E+04 | 7,46E+03 | 2,38E+04 | 0,00E+00 | 2,09E+04 | #DIV/0! | 0,04 |
| 105 | N-Acetylornithine                     | C00437 | Arginine and proline metabolism               | 175,1083 | 1,25 | + | 7,12E+04 | 7,74E+04 | 6,84E+04 | 2,56E+05 | 2,14E+05 | 2,70E+05 | 7,12E+04 | 2,56E+05 | 3,59    | 0,00 |
| 106 | Guanidinoacetate                      | C00581 | Arginine and proline metabolism               | 118,0617 | 1,22 | + | 6,05E+03 | 2,81E+04 | 2,92E+04 | 1,03E+04 | 8,56E+04 | 1,28E+05 | 2,81E+04 | 8,56E+04 | 3,05    | 0,20 |
| 107 | trans-4-Hydroxy-L-proline             | C01157 | Arginine and proline metabolism               | 132,0660 | 1,21 | + | 8,32E+05 | 9,16E+05 | 1,10E+06 | 1,99E+06 | 2,56E+06 | 3,40E+06 | 9,16E+05 | 2,56E+06 | 2,79    | 0,02 |
| 108 | 5-Aminopentanoate                     | C00431 | Arginine and proline metabolism               | 118,0869 | 1,64 | + | 2,38E+06 | 0,00E+00 | 3,91E+06 | 2,12E+06 | 2,34E+06 | 3,89E+06 | 2,38E+06 | 2,34E+06 | 0,98    | 0,61 |
| 109 | L-1-Pyrroline-3-hydroxy-5-carboxylate | C04281 | Arginine and proline metabolism               | 130,0503 | 1,80 | + | 3,25E+05 | 3,86E+05 | 3,58E+05 | 9,09E+05 | 1,03E+06 | 1,08E+06 | 3,58E+05 | 1,03E+06 | 2,87    | 0,00 |
| 110 | Pantothenol                           | C00864 | Panthothenate metabolism                      | 220,1184 | 1,33 | + | 5,95E+04 | 9,78E+04 | 1,03E+05 | 2,61E+05 | 7,29E+05 | 5,05E+05 | 9,78E+04 | 5,05E+05 | 5,16    | 0,04 |

|    |   |                                   |           |                                     |          |      |   |          |          |          |          |          |          |          |          |         |      |
|----|---|-----------------------------------|-----------|-------------------------------------|----------|------|---|----------|----------|----------|----------|----------|----------|----------|----------|---------|------|
| 11 | 1 | Pantetheine                       | C00831    | Panthothenate metabolism            | 279,1355 | 1,26 | + | 4,19E+04 | 0,00E+00 | 0,00E+00 | 0,00E+00 | 3,03E+04 | 6,26E+04 | 0,00E+00 | 3,03E+04 | #DIV/0! | 0,50 |
| 11 | 2 | Taurine                           | C00245    | Sulfur metabolism                   | 126,0224 | 1,25 | + | 1,75E+05 | 3,58E+05 | 3,38E+05 | 3,44E+05 | 5,06E+05 | 8,17E+05 | 3,38E+05 | 5,06E+05 | 1,50    | 0,15 |
| 11 | 3 | Hypotaurine                       | C00519    | Sulfur metabolism                   | 110,0277 | 1,20 | + | 3,25E+05 | 2,23E+05 | 5,19E+05 | 7,39E+04 | 1,09E+04 | 6,54E+04 | 3,25E+05 | 6,54E+04 | 0,20    | 0,03 |
| 11 | 4 | 3-Sulfino-L-alanine               | C00606    | Sulfur metabolism                   | 152,0014 | 1,21 | - | 1,07E+04 | 1,73E+04 | 1,70E+04 | 2,78E+04 | 3,14E+04 | 4,53E+04 | 1,70E+04 | 3,14E+04 | 1,85    | 0,03 |
| 11 | 5 | L-Cysteate                        | C00506    | Sulfur metabolism                   | 170,0128 | 1,69 | + | 1,82E+04 | 1,51E+04 | 1,68E+04 | 2,20E+04 | 2,43E+04 | 2,64E+04 | 1,68E+04 | 2,43E+04 | 1,45    | 0,01 |
| 11 | 6 | L-Methionine S-oxide              | C02989    | Sulfur metabolism                   | 166,0537 | 1,51 | + | 2,61E+05 | 3,88E+05 | 2,55E+05 | 6,93E+05 | 1,10E+06 | 1,13E+06 | 2,61E+05 | 1,10E+06 | 4,21    | 0,01 |
| 11 | 7 | 5-Hydroxyindoleacetate            | C05635    | Indole and Tryptophan               | 192,0659 | 1,30 | + | 2,98E+03 | 3,32E+03 | 2,14E+03 | 8,64E+03 | 1,64E+04 | 9,92E+03 | 2,98E+03 | 9,92E+03 | 3,33    | 0,02 |
| 11 | 8 | Indole                            | C00463    | Indole and Tryptophan               | 118,0657 | 1,27 | + | 7,45E+04 | 6,98E+04 | 5,25E+04 | 6,55E+04 | 1,14E+05 | 6,15E+04 | 6,98E+04 | 6,55E+04 | 0,94    | 0,46 |
| 11 | 9 | kynurenine                        | C00328    | Indole and Tryptophan               | 209,0924 | 1,25 | + | 2,26E+03 | 0,00E+00 | 2,52E+03 | 8,01E+04 | 1,56E+05 | 2,22E+05 | 2,26E+03 | 1,56E+05 | 69,01   | 0,02 |
| 11 | 0 | N-formyl kynurenine               | C02700    | Indole and Tryptophan               | 237,0873 | 1,25 | + | 0,00E+00 | 0,00E+00 | 0,00E+00 | 0,00E+00 | 4,12E+04 | 7,68E+04 | 0,00E+00 | 4,12E+04 | #DIV/0! | 0,15 |
| 12 | 1 | Glycerol 3-phosphate              | C00093    | Glycerophospholipid biosynthesis    | 173,0213 | 1,27 | + | 1,65E+06 | 2,03E+06 | 2,64E+06 | 2,02E+06 | 1,24E+06 | 1,09E+06 | 2,03E+06 | 1,24E+06 | 0,61    | 0,18 |
| 12 | 2 | Ethanolamine phosphate            | C00346    | Glycerophospholipid biosynthesis    | 142,0268 | 1,23 | + | 5,20E+05 | 9,19E+05 | 8,32E+05 | 1,57E+06 | 1,55E+06 | 2,51E+06 | 8,32E+05 | 1,57E+06 | 1,88    | 0,03 |
| 12 | 3 | N-Methylethanolamine phosphate    | C01210    | Glycerophospholipid biosynthesis    | 156,0425 | 1,13 | + | 2,17E+05 | 2,32E+05 | 2,18E+05 | 2,59E+05 | 3,22E+05 | 2,73E+05 | 2,18E+05 | 2,73E+05 | 1,25    | 0,04 |
| 12 | 4 | sn-glycero-3-Phosphoethanolamine  | C01233    | Glycerophospholipid biosynthesis    | 216,0629 | 1,22 | + | 6,19E+04 | 1,90E+05 | 1,39E+05 | 1,43E+05 | 2,07E+05 | 1,90E+05 | 1,39E+05 | 1,90E+05 | 1,37    | 0,30 |
| 12 | 5 | CDP-choline                       | C00307    | Glycerophospholipid biosynthesis    | 489,1154 | 1,21 | + | 2,96E+04 | 4,66E+04 | 1,30E+05 | 4,66E+04 | 3,18E+04 | 9,12E+04 | 4,66E+04 | 4,66E+04 | 1,00    | 0,75 |
| 12 | 6 | L-Carnitine                       | C00318    | Carnitine and fatty acid metabolsim | 162,1128 | 1,22 | + | 1,23E+07 | 2,06E+07 | 1,29E+07 | 5,21E+07 | 1,22E+08 | 1,36E+08 | 1,29E+07 | 1,22E+08 | 9,45    | 0,03 |
| 12 | 7 | propionyl-carnitine               | HMDB00824 | Carnitine and fatty acid metabolsim | 218,1392 | 1,25 | + | 1,12E+06 | 2,11E+06 | 1,08E+06 | 9,16E+06 | 2,08E+07 | 2,28E+07 | 1,12E+06 | 2,08E+07 | 18,51   | 0,02 |
| 12 | 8 | butanoyl-l-carnitine              | HMDB00736 | Carnitine and fatty acid metabolsim | 232,1548 | 1,25 | + | 1,46E+06 | 7,36E+05 | 6,28E+05 | 5,29E+06 | 3,73E+06 | 3,80E+06 | 7,36E+05 | 3,80E+06 | 5,16    | 0,00 |
| 12 | 9 | acyl-C4-OH                        | HMDB13127 | Carnitine and fatty acid metabolsim | 248,1498 | 1,27 | + | 1,94E+05 | 4,85E+05 | 7,85E+05 | 5,91E+05 | 1,20E+06 | 9,26E+05 | 4,85E+05 | 9,26E+05 | 1,91    | 0,16 |
| 13 | 0 | acyl-C4-DC                        | HMDB13133 | Carnitine and fatty acid metabolsim | 262,1290 | 1,25 | + | 4,11E+04 | 9,22E+04 | 7,56E+04 | 4,77E+04 | 1,31E+05 | 1,36E+05 | 7,56E+04 | 1,31E+05 | 1,73    | 0,34 |
| 13 | 1 | acyl-C5-OH                        | ac107     | Carnitine and fatty acid metabolsim | 262,1654 | 1,25 | + | 2,14E+05 | 3,63E+05 | 3,30E+05 | 2,44E+06 | 5,45E+06 | 4,32E+06 | 3,30E+05 | 4,32E+06 | 13,06   | 0,01 |
| 13 | 2 | Acetyl phosphate                  | C00227    | Other                               | 140,9957 | 1,45 | + | 5,60E+05 | 5,31E+05 | 4,06E+05 | 5,75E+05 | 2,83E+05 | 2,98E+05 | 5,31E+05 | 2,98E+05 | 0,56    | 0,34 |
| 13 | 3 | 1-Hydroxy-2-aminoethylphosphonate | C05678    | Other                               | 142,0268 | 1,23 | + | 5,20E+05 | 9,19E+05 | 8,32E+05 | 1,57E+06 | 1,55E+06 | 2,51E+06 | 8,32E+05 | 1,57E+06 | 1,88    | 0,03 |
| 13 | 4 | N5-Methyl-L-glutamine             | C03153    | Other                               | 161,0927 | 1,25 | + | 2,52E+04 | 1,44E+04 | 3,40E+04 | 5,22E+04 | 4,54E+04 | 5,86E+04 | 2,52E+04 | 5,22E+04 | 2,07    | 0,02 |
| 13 | 5 | 2-Methyleneglutarate              | C02930    | Other                               | 145,0499 | 1,30 | + | 1,09E+05 | 1,26E+05 | 1,84E+05 | 2,26E+05 | 2,00E+05 | 2,03E+05 | 1,26E+05 | 2,03E+05 | 1,61    | 0,04 |

|    |   |                                 |        |       |          |      |   |          |          |          |          |          |          |          |          |         |         |
|----|---|---------------------------------|--------|-------|----------|------|---|----------|----------|----------|----------|----------|----------|----------|----------|---------|---------|
| 13 | 6 | 4-Aminobenzoate                 | C00568 | Other | 138,0553 | 1,89 | + | 9,98E+04 | 1,08E+05 | 1,17E+05 | 2,01E+05 | 2,52E+05 | 2,14E+05 | 1,08E+05 | 2,14E+05 | 1,99    | 0,00    |
| 13 | 7 | Leucocyanidin                   | C05906 | Other | 307,0838 | 1,25 | + | 7,23E+04 | 1,09E+05 | 9,00E+04 | 7,16E+04 | 9,10E+04 | 5,95E+04 | 9,00E+04 | 7,16E+04 | 0,80    | 0,31    |
| 13 | 8 | beta-Butoxyethyl nicotinate     | C13138 | Other | 224,1286 | 1,24 | + | 2,93E+05 | 2,59E+05 | 3,05E+05 | 2,76E+05 | 1,97E+05 | 2,48E+05 | 2,93E+05 | 2,48E+05 | 0,85    | 0,17    |
| 13 | 9 | 3-Oxalomalate                   | C01990 | Other | 207,0147 | 1,20 | + | 3,17E+04 | 6,78E+04 | 5,61E+04 | 8,70E+04 | 1,63E+05 | 2,85E+05 | 5,61E+04 | 1,63E+05 | 2,91    | 0,10    |
| 14 | 0 | Diallyl sulfide                 | C08370 | Other | 115,0574 | 1,09 | + | 1,71E+03 | 4,67E+03 | 5,28E+03 | 2,82E+04 | 5,87E+04 | 4,78E+04 | 4,67E+03 | 4,78E+04 | 10,24   | 0,01    |
| 14 | 1 | D-glucono-1,5-lactone           | C00198 | Other | 179,0550 | 1,09 | + | 7,89E+03 | 2,45E+04 | 1,27E+04 | 3,83E+04 | 4,40E+04 | 6,51E+04 | 1,27E+04 | 4,40E+04 | 3,47    | 0,02    |
| 14 | 2 | 2-Dehydro-3-deoxy-D-glucarate   | C03921 | Other | 193,0350 | 1,58 | + | 0,00E+00 | 2,43E+03 | 4,38E+03 | 7,76E+03 | 2,90E+04 | 2,90E+04 | 2,43E+03 | 2,90E+04 | 11,93   | 0,05    |
| 14 | 3 | Ferric gluconate                | C13511 | Other | 196,0581 | 1,10 | + | 1,81E+04 | 1,11E+04 | 4,34E+03 | 2,44E+04 | 3,11E+04 | 3,04E+04 | 1,11E+04 | 3,04E+04 | 2,74    | 0,02    |
| 14 | 4 | 6-Thioxanthine 5--monophosphate | C16618 | Other | 381,0237 | 1,13 | + | 4,35E+04 | 2,67E+04 | 0,00E+00 | 7,48E+04 | 1,03E+04 | 1,40E+04 | 2,67E+04 | 1,40E+04 | 0,53    | 0,71    |
| 14 | 5 | Deoxyribose triphosphate        | C12347 | Other | 374,9649 | 1,15 | + | 0,00E+00 | #DIV/0! | #DIV/0! |
| 14 | 6 | Riboflavin                      | C00255 | Other | 377,1474 | 1,26 | + | 2,96E+05 | 2,53E+05 | 1,82E+05 | 8,58E+04 | 2,22E+05 | 1,28E+05 | 2,53E+05 | 1,28E+05 | 0,51    | 0,13    |
| 14 | 7 | N-Amidino-L-aspartate           | C03139 | Other | 176,0662 | 1,25 | + | 1,90E+04 | 3,57E+04 | 4,41E+04 | 6,87E+04 | 2,42E+04 | 6,19E+03 | 3,57E+04 | 2,42E+04 | 0,68    | 1,00    |
| 14 | 8 | threo-3-Hydroxy-L-aspartate     | C11511 | Other | 150,0388 | 1,49 | + | 1,39E+04 | 2,69E+04 | 1,86E+04 | 4,00E+04 | 6,23E+04 | 6,55E+04 | 1,86E+04 | 6,23E+04 | 3,34    | 0,02    |
| 14 | 9 | N-Carbamyl-L-glutamate          | C05829 | Other | 191,0673 | 1,21 | + | 3,08E+04 | 3,45E+04 | 4,40E+04 | 1,97E+05 | 2,46E+05 | 3,67E+05 | 3,45E+04 | 2,46E+05 | 7,12    | 0,01    |
